# Supplementary material for: [4 + 2]-Cycloadditions of a thiazol-based tricyclic 1,4-diphosphinine and a new easy 1,4-diphosphinine protection deprotection strategy
Source: Royal Society of Chemistry journal article supplement (doi:10.1039/d0dt02529a), 2020-01-01
Supplement: d0dt02529a1.pdf [file d0dt02529a1.pdf]

## Electronic supporting information

### **[4+2]-Cycloadditions of a thiazol-based tricyclic 1,4-diphosphinine and a new easy 1,4-diphosphinine protection deprotection strategy**

I. Begum,<sup>[a]</sup> T. Kalisch,<sup>[a]</sup> G. Schnakenburg,<sup>[b]</sup> Z. Kelemen,<sup>[b]</sup> L. Nyulászi,<sup>[b]\*</sup> and R. Streubel<sup>[a]\*</sup>

|   |                                                            |    |
|---|------------------------------------------------------------|----|
| 1 | Experimental Procedures and spectra .....                  | 2  |
| 2 | Crystal structure data .....                               | 19 |
| 3 | Theoretical Investigations and computational details ..... | 21 |
| 4 | References .....                                           | 44 |

# 1 Experimental Procedures and spectra

## General information

All operations were performed under an argon atmosphere, using common Schlenk techniques and dry solvents. Diethyl ether, tetrahydrofuran, and *n*-pentane were dried over sodium wire/benzophenone and further purified by subsequent distillation. The NMR spectra for compound 7a and 7b were recorded on a Bruker AX-300 spectrometer (300.1 MHz for  $^1\text{H}$ , 75.5 MHz for  $^{13}\text{C}$ , and 121.5 MHz for  $^{31}\text{P}$ ). While the NMR spectra for the rest of the compounds were recorded on a Bruker Avance III HD Ascend 500 MHz spectrometer (500.1 MHz for  $^1\text{H}$ , 125.7 MHz for  $^{13}\text{C}$ , and 202.4 MHz for  $^{31}\text{P}$ ). The  $^1\text{H}$  and  $^{13}\text{C}$  NMR spectra were referenced to the residual proton resonances and the  $^{13}\text{C}$  NMR signals of the deuterated solvents and  $^{31}\text{P}$  to 85%  $\text{H}_3\text{PO}_4$  as external standard, respectively. Melting points were determined in one-side melted off capillaries using a Büchi Type S or a Carl Roth Type MPM-2 apparatus, they are uncorrected. Elemental analyses were carried out on a Vario EL gas chromatograph. Mass spectrometric data were collected on a Kratos MS 50 spectrometer using EI, 70 eV. IR spectra of all compounds were recorded on a Thermo IR spectrometer with an attenuated total reflection (ATR) attachment. UV/vis spectroscopy was performed on a Shimadzu UV-1650PC spectrometer ( $\lambda = 190\text{--}900\text{ nm}$ ) using sealed quartz glass cells (Hellma) of optical path 1 cm at ambient temperature. The X-ray analysis were performed on a Bruker APEX-II CCD or a Bruker X8-KappaApexII type diffractometer at 100(2) K. The structures were solved by direct methods refined by full-matrix least-squares technique in anisotropic approximation for non-hydrogen atoms using SHELXS97 and SHELXL97<sup>[1]</sup> program packages. Hydrogen atoms were located from Fourier synthesis and refined isotropically. Crystallographic data for the structures reported in this paper have been deposited with the Cambridge Crystallographic Data Centre as supplementary publication no. CCDC-1941598 (**2**), CCDC-1941597 (**3**) which can be obtained free of charge via [www.ccdc.cam.ac.uk/data\\_request/cif](http://www.ccdc.cam.ac.uk/data_request/cif).

### 1.1 Synthesis of tricyclic compounds 2 and 3

In a Schlenk tube, reagent (see the table below) was added to a suspension of 1,4-diphosphinine **1** in dry toluene (temperature is given in the table below) and stirred (time is given in the table below). Solvent was removed under reduced pressure ( $8 \cdot 10^{-3}$  mbar) and the obtained solid was washed with *n*-pentane ( $2 \cdot 2\text{ mL}$ ) and dried *in vacuo* ( $8 \cdot 10^{-3}$  mbar). Compound **2** was crystallized via cooling down its toluene solution at  $-30\text{ }^\circ\text{C}$ . Compound **3** was crystallized via slow diffusion of *n*-pentane into a concentrated toluene solution at  $-30\text{ }^\circ\text{C}$ .

**1.1.1. 7,8-Bis(methyloxocarbonyl)-[2,3-d:5,6-d']bis(3-<sup>n</sup>butyl-thiazole-2-thione)-1,4-diphospha-bicyclo[2.2.2]octa-2,5,7-triene (2)**

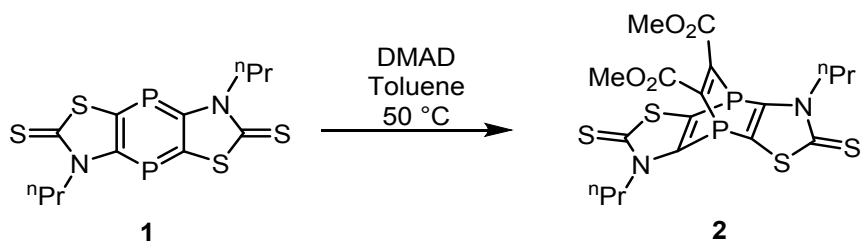

|                           | amount used (g/mL) | mmol | min/°C |
|---------------------------|--------------------|------|--------|
| <b>1</b>                  | 0.50 g             | 1.32 |        |
| <b>DMAD</b>               | 0.17 mL            | 1.39 |        |
| <b>Toluene</b>            | 20 mL              |      |        |
| <b>Reaction time/temp</b> |                    |      | 45/50  |

Yield: 0.50 g (0.96 mmol), 73 %, yellow orange solid, m.p, 205°C; <sup>1</sup>H NMR (300.1 MHz, CD<sub>2</sub>Cl<sub>2</sub>): δ = 1.01 (t, 6H, <sup>3</sup>J<sub>H,H</sub> = 7.41 Hz, CH<sub>2</sub>CH<sub>2</sub>CH<sub>3</sub>), 1.80 (m, 4H, CH<sub>2</sub>CH<sub>2</sub>CH<sub>3</sub>), 3.82 (s, OCH<sub>3</sub>), 4.27-4.51 (m, 4H, CH<sub>2</sub>-CH<sub>2</sub>-CH<sub>3</sub>), <sup>13</sup>C{<sup>1</sup>H} NMR (75.5 MHz, CD<sub>2</sub>Cl<sub>2</sub>): δ = 10.9 (s, CH<sub>2</sub>CH<sub>2</sub>CH<sub>3</sub>), 22.3 (t, <sup>4/5</sup>J<sub>P,C</sub> = 1.62 Hz, N CH<sub>2</sub>CH<sub>2</sub>CH<sub>3</sub>), 51.5 (t, <sup>3/4</sup>J<sub>P,C</sub> = 4.8 Hz, CH<sub>2</sub>CH<sub>2</sub>CH<sub>3</sub>), 53.4 (s, OCH<sub>3</sub>), 131.7 (dd, <sup>1</sup>J<sub>P,C</sub> = 17.2 Hz, <sup>2</sup>J<sub>P,C</sub> = 15.0 Hz, C<sup>5</sup>), 157.6 (dd, <sup>1</sup>J<sub>P,C</sub> = 15.1 Hz, <sup>2</sup>J<sub>P,C</sub> = 14.0 Hz, CCO<sub>2</sub>Me), 160.1 (dd, <sup>1</sup>J<sub>P,C</sub> = 11.1 Hz, <sup>2</sup>J<sub>P,C</sub> = 9.3 Hz, C<sup>4</sup>), 165.5 (t, J<sub>P,C</sub> = 17.1 Hz, CCO<sub>2</sub>Me), 189.4 (br, C=S), <sup>31</sup>P{<sup>1</sup>H} NMR (121.5 MHz, CD<sub>2</sub>Cl<sub>2</sub>): δ = -75.4 (s); IR (ATR,  $\tilde{\nu}$  {cm<sup>-1</sup>):  $\tilde{\nu}$  = 2953 (w), 1711 (vs), 1572 (m), 1430 (m), 1359 (s), 1332 (m), 1253 (vs), 1212 (vs), 1141 (vs), 1060 (s), 1020 (s), 915 (m), 879 (s), 815 (vs), 744 (m), 653 (s), 618 (s), 468 (s); MS (EI, 70 eV): m/z (%) = 292.0 (100) [C<sub>6</sub>N<sub>2</sub>P<sub>2</sub>S<sub>4</sub>]<sup>+</sup>, 301 (10) [C<sub>9</sub>H<sub>7</sub>N<sub>2</sub>P<sub>2</sub>S<sub>3</sub>]<sup>+</sup>, 376.0 (75) [C<sub>12</sub>H<sub>14</sub>N<sub>2</sub>P<sub>2</sub>S<sub>4</sub>]<sup>+</sup>, 518.0 (68) [M]<sup>+</sup>; HR-MS: found = 517.9777, calc. = 517.9781; Elemental analysis for C<sub>18</sub>H<sub>20</sub>N<sub>2</sub>O<sub>4</sub>P<sub>2</sub>S<sub>4</sub>: Calculated C 41.69 H 3.89 N 5.40 S 24.73, Found C 41.53 H 3.72 N 5.37 S 24.82.

**1.1.2. 7,8-(*N*-Phenylmaleimide)-[2,3-d:5,6-d']bis(3-<sup>n</sup>propyl-thiazole-2-thione)-1,4-diphospha-7,8-dihydro-bicyclo[2.2.2]octa-2,5-diene (3)**

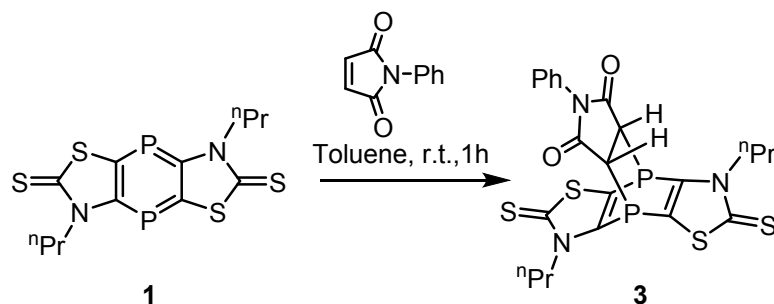

|                                   | amount used (g/mL) | mmol | min/°C |
|-----------------------------------|--------------------|------|--------|
| <b>1</b>                          | 0.35 g             | 0.92 |        |
| <b>1-phenyl pyrrole-1,5-dione</b> | 0.16 g             | 0.97 |        |
| <b>Toluene</b>                    | 15 mL              |      |        |
| <b>Reaction time/temp</b>         |                    |      | 120/25 |

Yield: 0.48 g (0.87 mmol), 94 %, white solid, m.p. 289 °C; <sup>1</sup>H NMR (300.1 MHz, CD<sub>2</sub>Cl<sub>2</sub>): δ = 1.01 (t, 3H, <sup>3</sup>J<sub>H,H</sub> = 7.37 Hz, CH<sub>2</sub>CH<sub>2</sub>CH<sub>3</sub>), 1.10 (t, 3H, <sup>3</sup>J<sub>H,H</sub> = 7.40 Hz, CH<sub>2</sub>CH<sub>2</sub>CH<sub>3</sub>), 1.68-1.83 (m, 2H, CH<sub>2</sub>CH<sub>2</sub>CH<sub>3</sub>), 1.84-1.94 (m, 2H, CH<sub>2</sub>CH<sub>2</sub>CH<sub>3</sub>), 3.86 (m, 1H, (CHCO)<sub>2</sub>N-Ph), 3.95 (m, 1H, (CHCO)<sub>2</sub>N-C<sub>6</sub>H<sub>5</sub>), 4.23-4.54 (m, 4H, CH<sub>2</sub>-CH<sub>2</sub>-CH<sub>3</sub>), 6.90-7.00 (m, 2H, N-C<sub>6</sub>H<sub>5</sub>), 7.44-7.51 (m, 3H, C<sub>6</sub>H<sub>5</sub>); <sup>13</sup>C{<sup>1</sup>H} NMR (75.5 MHz, CD<sub>2</sub>Cl<sub>2</sub>): δ = 11.2 (s, CH<sub>2</sub>CH<sub>2</sub>CH<sub>3</sub>), 11.3 (s, CH<sub>2</sub>CH<sub>2</sub>CH<sub>3</sub>), 22.3 (d, <sup>4</sup>J<sub>P,C</sub> = 3.0 Hz, CH<sub>2</sub>CH<sub>2</sub>CH<sub>3</sub>), 22.8 (d, <sup>4</sup>J<sub>P,C</sub> = 3.4 Hz, CH<sub>2</sub>CH<sub>2</sub>CH<sub>3</sub>), 44.1 (dd, <sup>1</sup>J<sub>P,C</sub> = 16.4 Hz, <sup>2</sup>J<sub>P,C</sub> = 2.3 Hz, P-CH), 44.6 (dd, <sup>1</sup>J<sub>P,C</sub> = 16.3 Hz, <sup>2</sup>J<sub>P,C</sub> = 2.2 Hz, P-CH), 51.6 (d, <sup>3</sup>J<sub>P,C</sub> = 10.2 Hz, CH<sub>2</sub>CH<sub>2</sub>CH<sub>3</sub>), 125.4 (dd, <sup>1</sup>J<sub>P,C</sub> = 29.5 Hz, <sup>2</sup>J<sub>P,C</sub> = 5.8 Hz, C<sup>5</sup>), 126.8 (s, N-C<sub>6</sub>H<sub>5</sub>), 127.2 (dd, <sup>1</sup>J<sub>P,C</sub> = 25.1 Hz, <sup>2</sup>J<sub>P,C</sub> = 5.5 Hz, C<sup>5</sup>), 128.8 (s, C<sub>6</sub>H<sub>5</sub>), 129.9 (s, C<sub>6</sub>H<sub>5</sub>), 131.3 (s, C<sub>6</sub>H<sub>5</sub>), 151.7 (dd, <sup>2</sup>J<sub>P,C</sub> = 21.5 Hz, <sup>2</sup>J<sub>P,C</sub> = 3.5 Hz, C<sup>4</sup>), 152.5 (dd, <sup>2</sup>J<sub>P,C</sub> = 17.1 Hz, <sup>2</sup>J<sub>P,C</sub> = 2.3 Hz, C<sup>4</sup>), 172.2 (d, <sup>2</sup>J<sub>P,C</sub> = 6.5 Hz, (CHCO)<sub>2</sub>N-C<sub>6</sub>H<sub>5</sub>), 172.7 (d, <sup>2</sup>J<sub>P,C</sub> = 6.5 Hz, (CHCO)<sub>2</sub>N-C<sub>6</sub>H<sub>5</sub>), 191.0 (d, <sup>3</sup>J<sub>P,C</sub> = 2.0 Hz, C=S), 191.2 (d, <sup>3</sup>J<sub>P,C</sub> = 1.9 Hz, C=S); <sup>31</sup>P{<sup>1</sup>H} NMR (121.5 MHz, CD<sub>2</sub>Cl<sub>2</sub>): δ = -75.7 (d, <sup>3</sup>J<sub>P,P</sub> = 28.8 Hz, P), -74.3 (d, <sup>3</sup>J<sub>P,P</sub> = 28.8 Hz, P); IR (ATR,  $\tilde{\nu}$  {cm<sup>-1</sup>):  $\tilde{\nu}$  = 2966 (w), 2869 (w), 1769 (m), 1705 (vs), 1491 (w), 1458 (m), 1360 (vs), 1286 (s), 1214 (s), 1140 (s), 1024 (s), 925 (s), 821 (s), 735 (s), 696 (s), 621 (m), 735 (s), 696 (s), 621 (m), 541 (m), 452 (s); MS (EI, 70 eV): m/z (%) = 549.1 (10) [M]<sup>+</sup>, 549.1 (10) [M]<sup>+</sup>, 376.0 (85) [C<sub>12</sub>H<sub>14</sub>N<sub>2</sub>P<sub>2</sub>S<sub>4</sub>]<sup>+</sup>, 291.9 (100) [M-2<sup>n</sup>Pr- C<sub>10</sub>H<sub>7</sub>NO<sub>2</sub>]<sup>+</sup>, 173.2 (50) [C<sub>10</sub>H<sub>7</sub>NO<sub>2</sub>]<sup>+</sup>; Elemental analysis for C<sub>22</sub>H<sub>21</sub>N<sub>3</sub>O<sub>2</sub>P<sub>2</sub>S<sub>4</sub>; Calculated C 48.08 H 3.85 N 7.65 S 23.33, Found C 48.20 H 3.89 N 7.50 S 23.14.

## 1.2 Synthesis of tricyclic compound 4

In a Schlenk tube, 4-phenyl-1,2,4-triazoline-3,5-dione (see the table below) was added to a suspension of 1,4-diphosphinine **1** in dry toluene (temperature is given in the table below) and stirred (time is given in the table below). Solvent was filtered off and the obtained solid was washed with *n*-pentane (3 · 3 mL) and dried *in vacuo* ( $8 \cdot 10^{-3}$  mbar).

### 1.2.1 7,8-(4-Phenyl-1,2,4-triazoline-3,5-dione)-[2,3-d:5,6-d']bis(3-<sup>n</sup>propylthiazole-2-thione)-1,4-diphospha-7,8-dihydro-bicyclo[2.2.2]octa-2,5-diene (**4**)

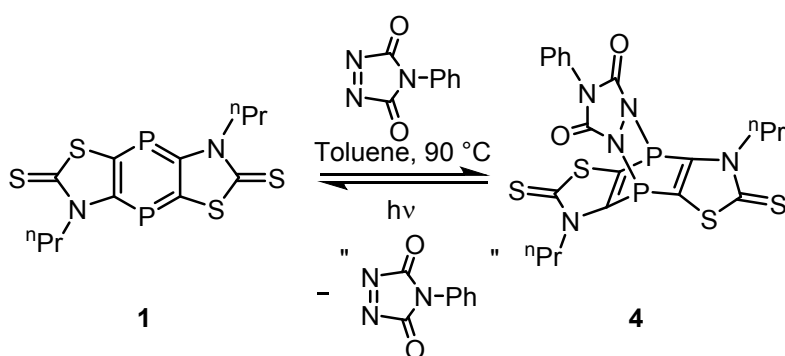

|                                       | amount used (g/mL) | mmol  | min/°C |
|---------------------------------------|--------------------|-------|--------|
| <b>1</b>                              | 0.049 g            | 0.130 |        |
| <b>4-Phenyl-1,2,4-triazolinedione</b> | 0.024 g            | 0.136 |        |
| <b>Toluene</b>                        | 2 mL               |       |        |
| <b>Reaction time/temp</b>             |                    |       | 30/90  |

Yield: 0.048 g (0.087 mmol), 67 %, light yellow solid;  $^1\text{H}$  NMR (500.1 MHz, 298.0 K  $\text{CDCl}_3$ ):  $\delta$  = 1.03 (t, 6H,  $^3J_{\text{H,H}} = 7.33$  Hz,  $\text{CH}_2\text{CH}_2\text{CH}_3$ ), 1.80-1.92 (m, 4H,  $\text{CH}_2\text{CH}_2\text{CH}_3$ ), 4.35-4.43 (m, 2H,  $\text{CH}_2\text{CH}_2\text{CH}_3$ ), 4.45-4.52 (m, 2H,  $\text{CH}_2\text{CH}_2\text{CH}_3$ ), 7.41-7.45 (m, 2H,  $\text{C}_6\text{H}_5$ ), 7.46-7.49 (m, 1H,  $p\text{C}_6\text{H}_5$ ), 7.49-7.51 (m, 2H,  $\text{C}_6\text{H}_5$ );  $^{13}\text{C}\{^1\text{H}\}$  NMR (125.8 MHz, 298.0 K,  $\text{CDCl}_3$ ):  $\delta$  = 11.4 (s,  $\text{CH}_2\text{CH}_2\text{CH}_3$ ), 22.7 (s,  $\text{CH}_2\text{CH}_2\text{CH}_3$ ), 51.1 (s,  $\text{CH}_2\text{CH}_2\text{CH}_3$ ), 125.7 (s,  $p\text{C}_6\text{H}_5$ ), 125.9 (s,  $\text{C}_6\text{H}_5$ ), 129.2 (d,  $^2J_{\text{P,C}} = 2.42$  Hz,  $\text{N}(\text{CO})\text{N}$ ), 129.5 ( $\text{C}_6\text{H}_5$ ), 130.7 (s, *ipso*- $\text{C}_6\text{H}_5$ ), 150.6 (s, PCS), 155.2 (s, PCN), 189.4 (s, C=S);  $^{31}\text{P}\{^1\text{H}\}$  NMR (202.5 MHz, 298.0 K,  $\text{CD}_2\text{Cl}_2$ ):  $\delta$  = -45.8 (s);  $^{31}\text{P}$  NMR (202.5 MHz, 298.0 K,  $\text{CDCl}_3$ ):  $\delta$  [ppm] = -45.8 (s); IR (ATR,  $\tilde{\nu}$   $\{\text{cm}^{-1}\}$ ):  $\tilde{\nu}$  = 1699 (s), 1748 (s), 2873 (w), 2932 (w), 2961 (w); UV7vis (in  $\text{CH}_2\text{Cl}_2$ ,  $\lambda_{\text{max}}$  {nm} (abs.)):  $\lambda_{\text{max}} = 317\text{sh}$  (0.95), 327 (1.00), 380sh (0.21), 496 (0.04); MS (EI, 70 eV):  $m/z$  (%) = 549.1 (10)  $[\text{M}]^+$ , 549.1 (10)  $[\text{M}]^+$ , 376.0 (85)  $[\text{C}_{12}\text{H}_{14}\text{N}_2\text{P}_2\text{S}_4]^+$ , 291.9 (100)  $[\text{M}-2^{\text{nPr}}-\text{C}_{10}\text{H}_7\text{NO}_2]^+$  173.2 (50)  $[\text{C}_{10}\text{H}_7\text{NO}_2]^+$ ; Elemental analysis for  $\text{C}_{22}\text{H}_{21}\text{N}_3\text{O}_2\text{P}_2\text{S}_4$ ; Calculated C 48.08 H 3.85 N 7.65 S 23.33, Found C 48.20 H 3.89 N 7.50 S 23.14.

### 1.3 Photochemical studies on 2

A solution of **2** in dichloromethane was irradiated (240-400 nm) for 1.5 h at ambient temperature.  $^{31}\text{P}\{^1\text{H}\}$  NMR spectra of solutions before and after irradiation were measured (see below).

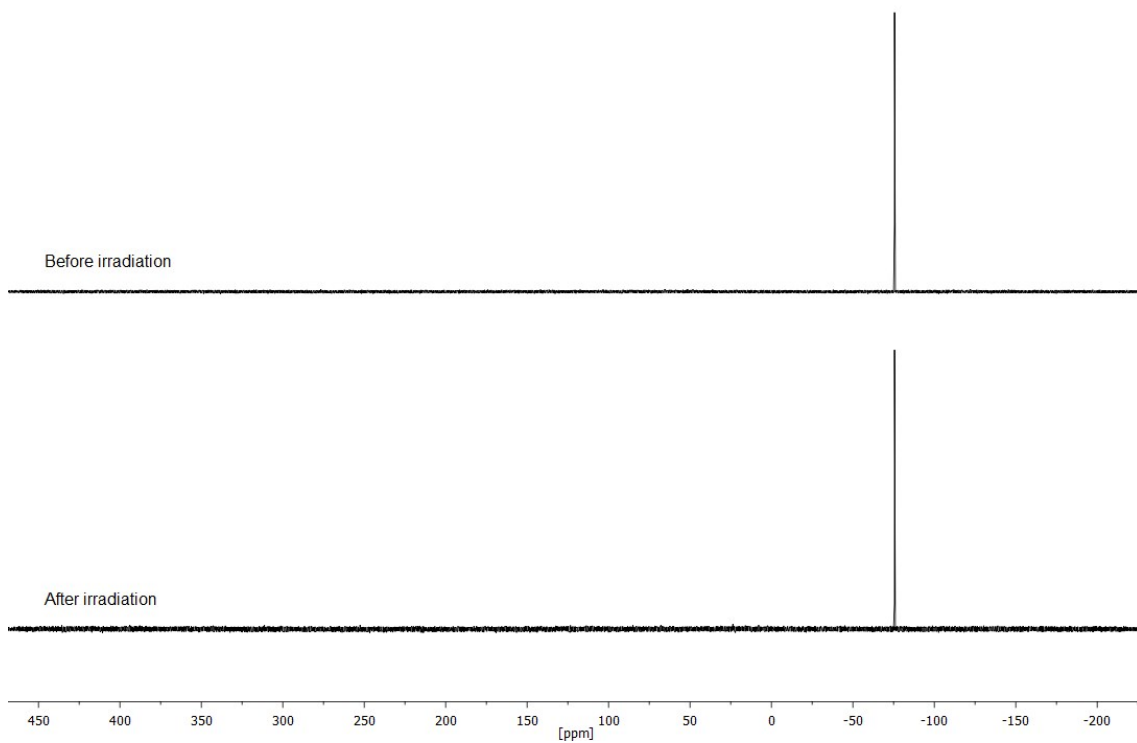

**Figure 1**  $^{31}\text{P}\{^1\text{H}\}$  NMR spectra ( $\text{CH}_2\text{Cl}_2$ ) of **2** before and after the irradiation.

### 1.4 Photochemical studies on 3

A solution of **3** in dichloromethane was irradiated (240-400 nm) for 1.5 h at ambient temperature.  $^{31}\text{P}\{^1\text{H}\}$  NMR spectra of solutions before and after irradiation were measured (see below).

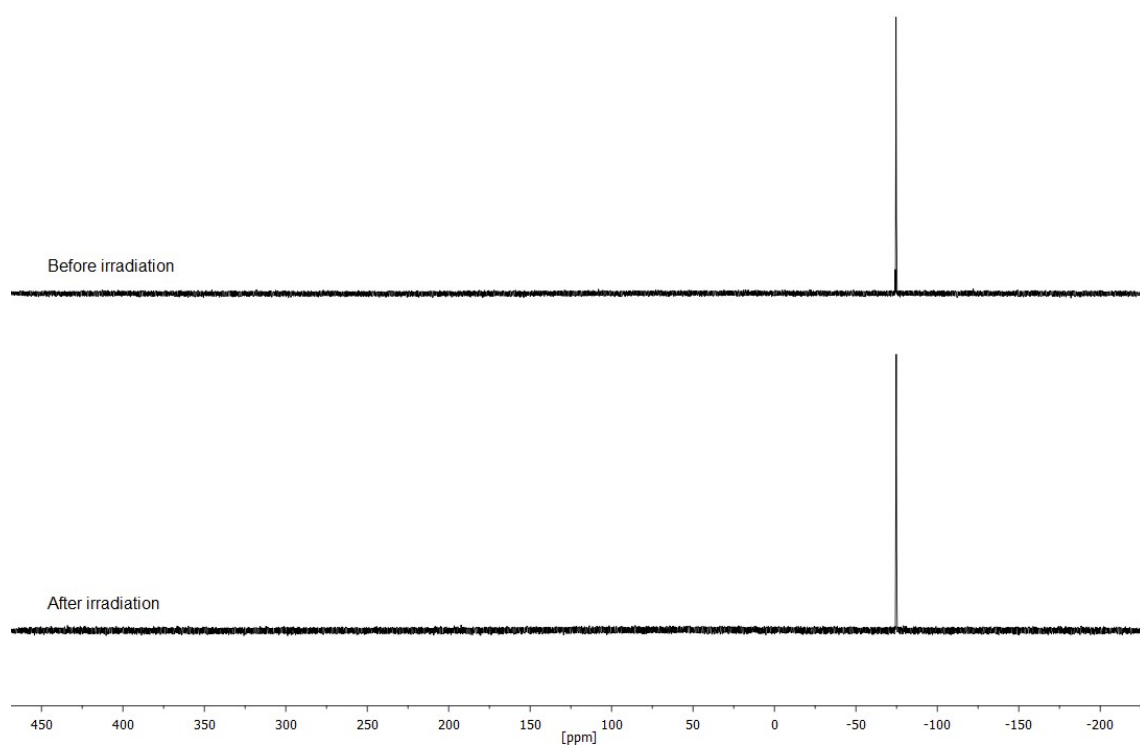

**Figure 2**  $^{31}\text{P}\{^1\text{H}\}$  NMR spectra ( $\text{CH}_2\text{Cl}_2$ ) of **2** before and after the irradiation.

### 1.5 Photochemical studies on **4**

A solution of 80 mg **4** in 24 mL dichloromethane was irradiated (240-400 nm) for 2 h at 10 °C. The dichloromethane was removed under reduced pressure (ca.  $10^{-1}$  mbar) and the residue was splitted into two. To one aliquot 11 mg (0.063 mmol) 4-phenyl-1,2,4-triazoline-3,5-dione was added. After addition of 5 mL toluene to each aliquot the two mixtures were heated to 90 °C for 2 h before filtering off the toluene solution.  $^{31}\text{P}\{^1\text{H}\}$  NMR spectra of both residues and both filtered solutions were measured (see below).

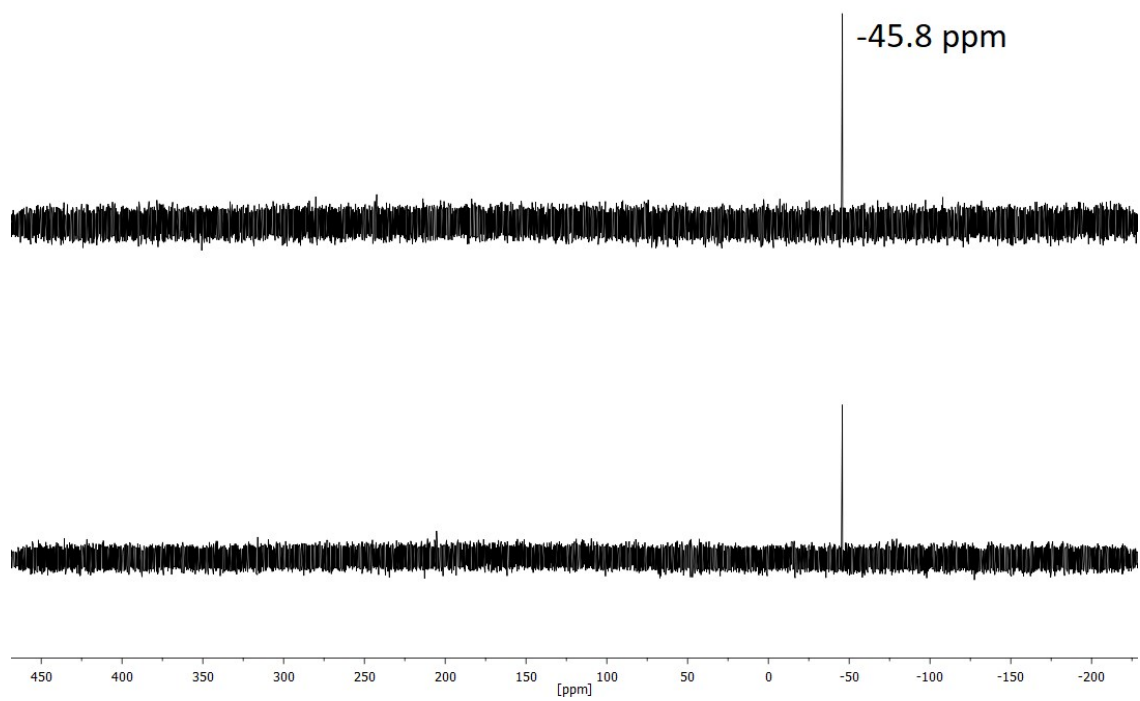

**Figure 3**  $^{31}\text{P}\{^1\text{H}\}$  NMR spectra of the residues.

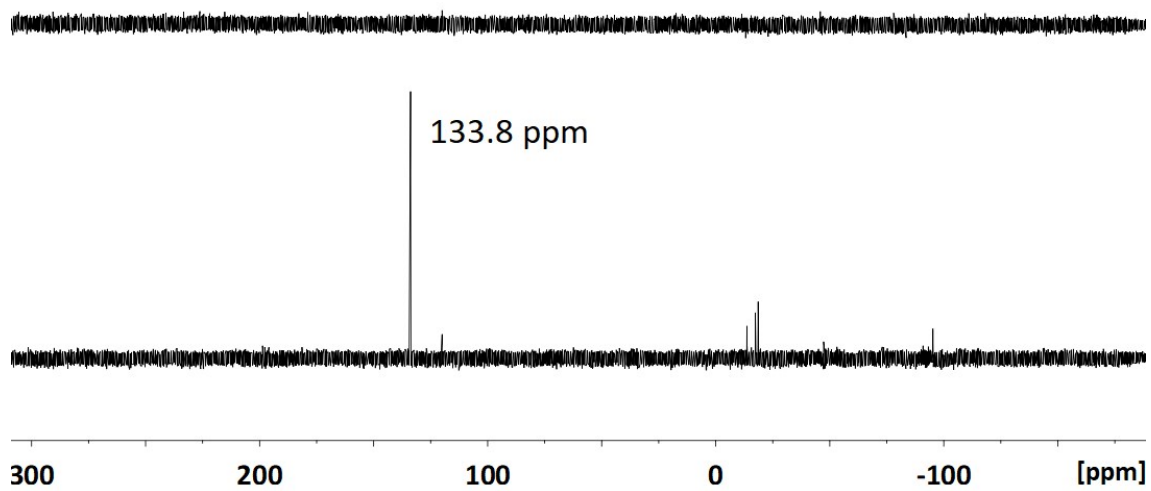

**Figure 4**  $^{31}\text{P}\{^1\text{H}\}$  NMR spectra of filtered solutions.





## 1.6 NMR spectra

### Figure 5a-d NMR spectra of 2

#### $^1\text{H}$ NMR spectrum

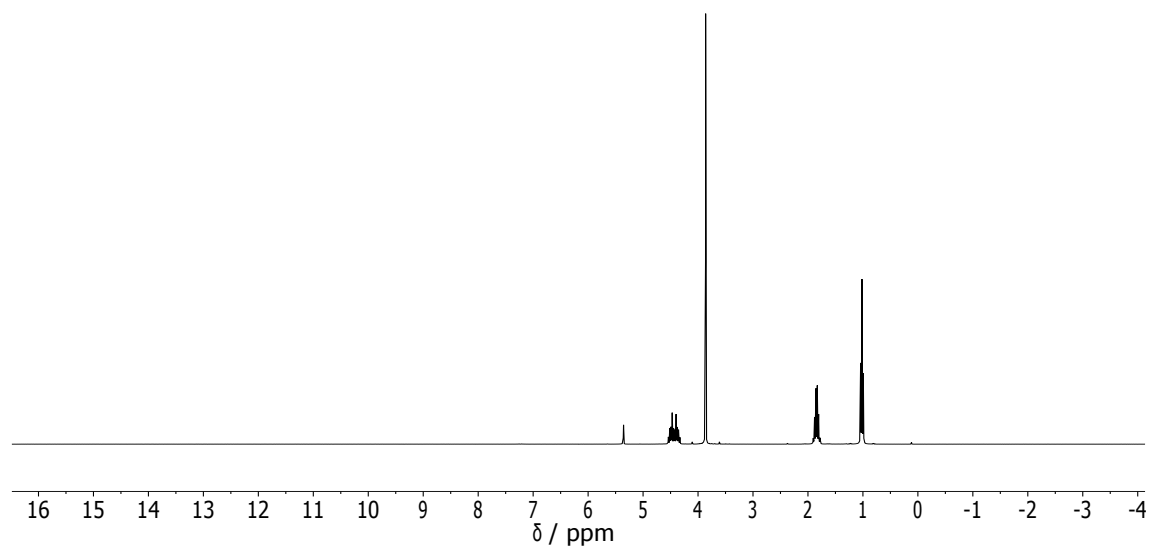

#### $^{13}\text{C}$ NMR spectrum

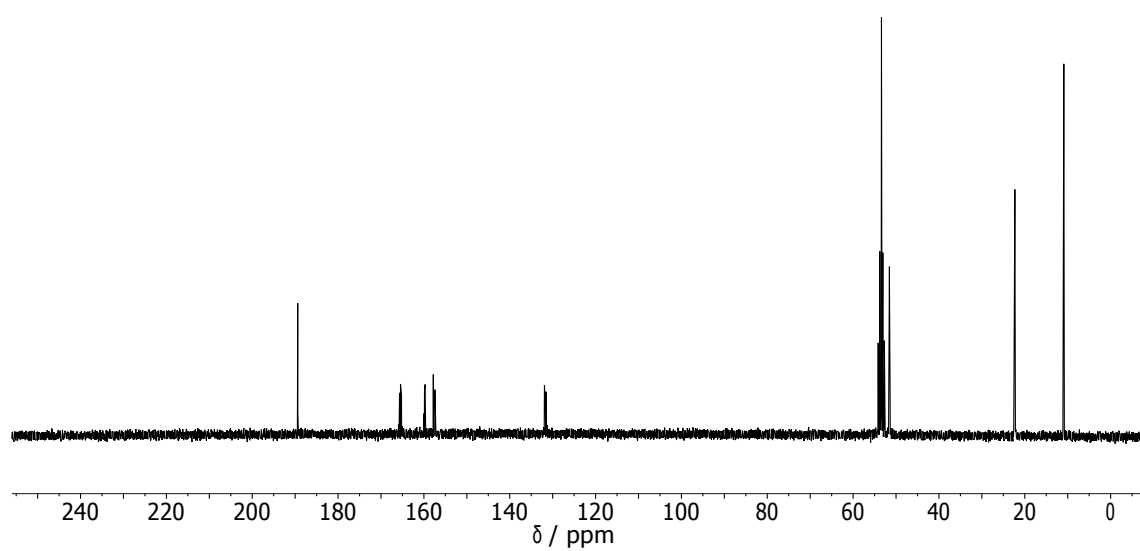

$^{31}\text{P}\{^1\text{H}\}$  spectrum

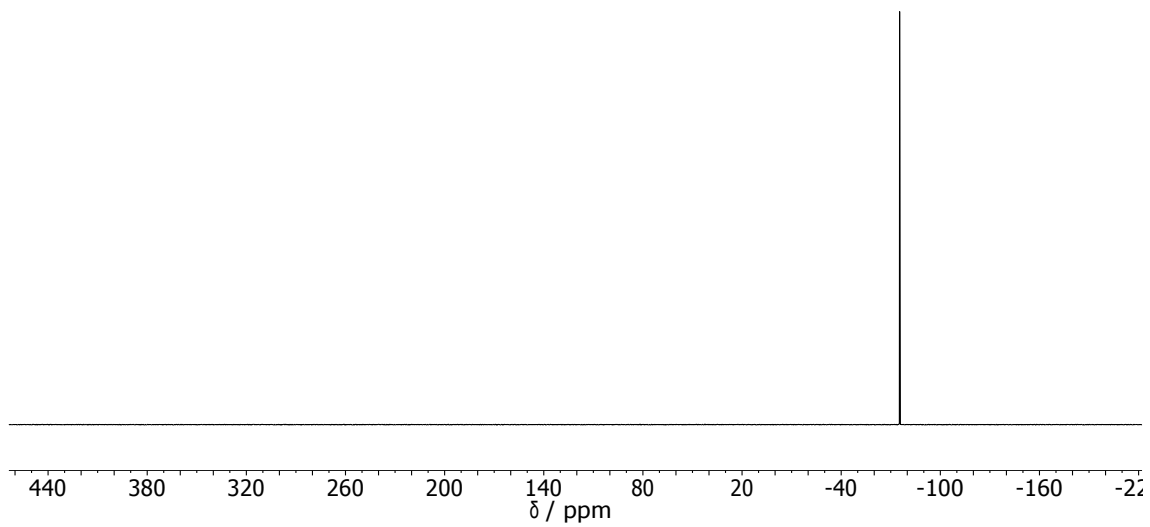

$^{31}\text{P}$  NMR spectrum

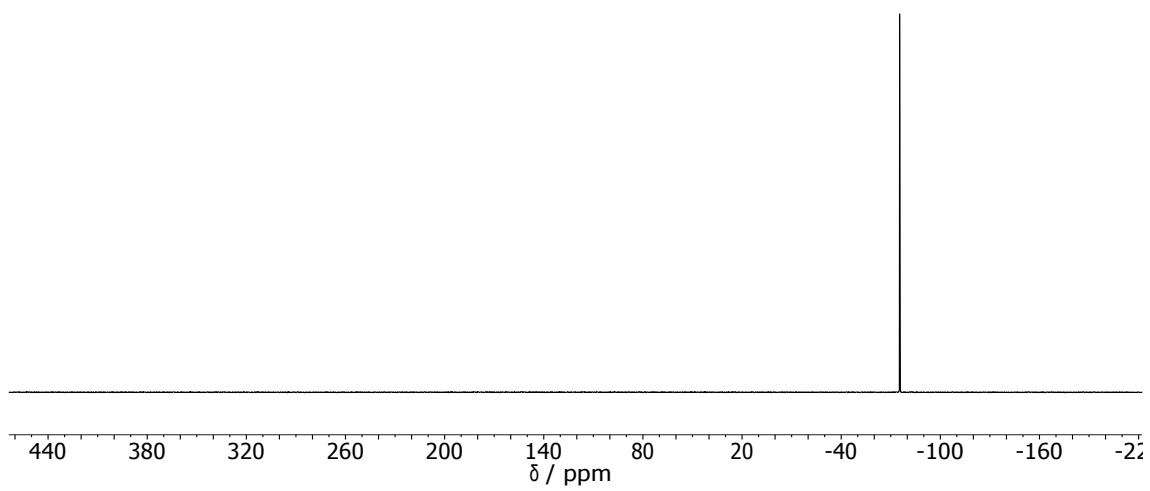

Figure 6a-d NMR spectra of **3**

$^1\text{H}$  NMR spectrum

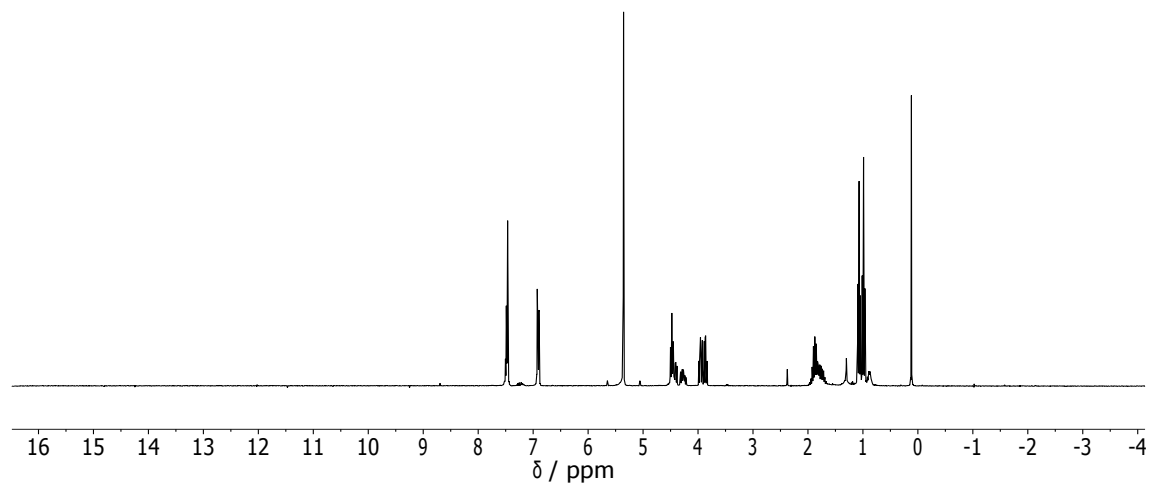

$^{13}\text{C}$  NMR spectrum

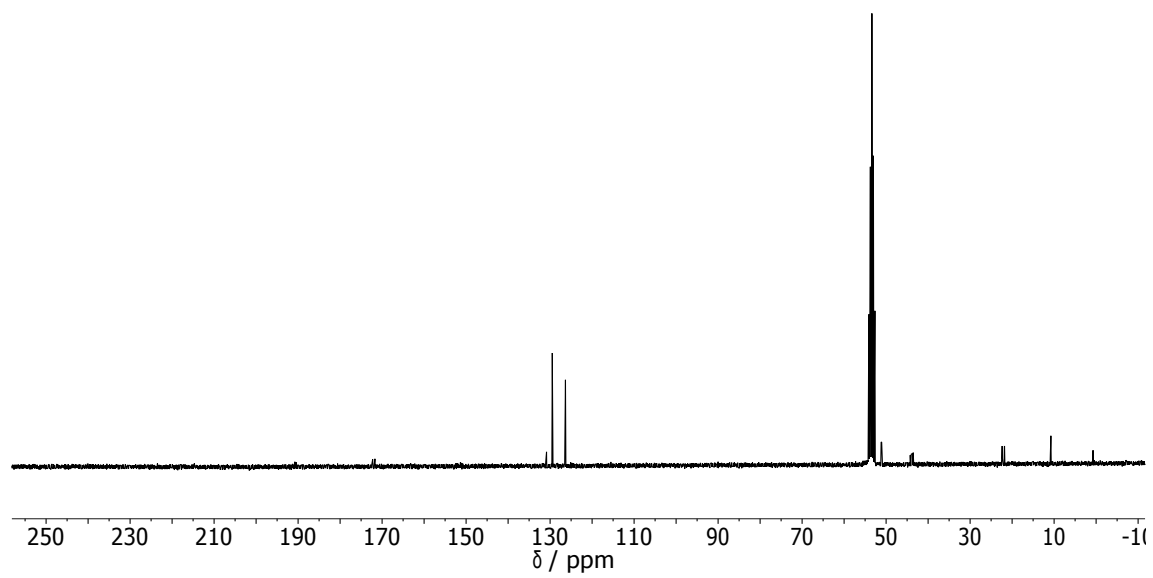

$^{31}\text{P}\{^1\text{H}\}$  spectrum

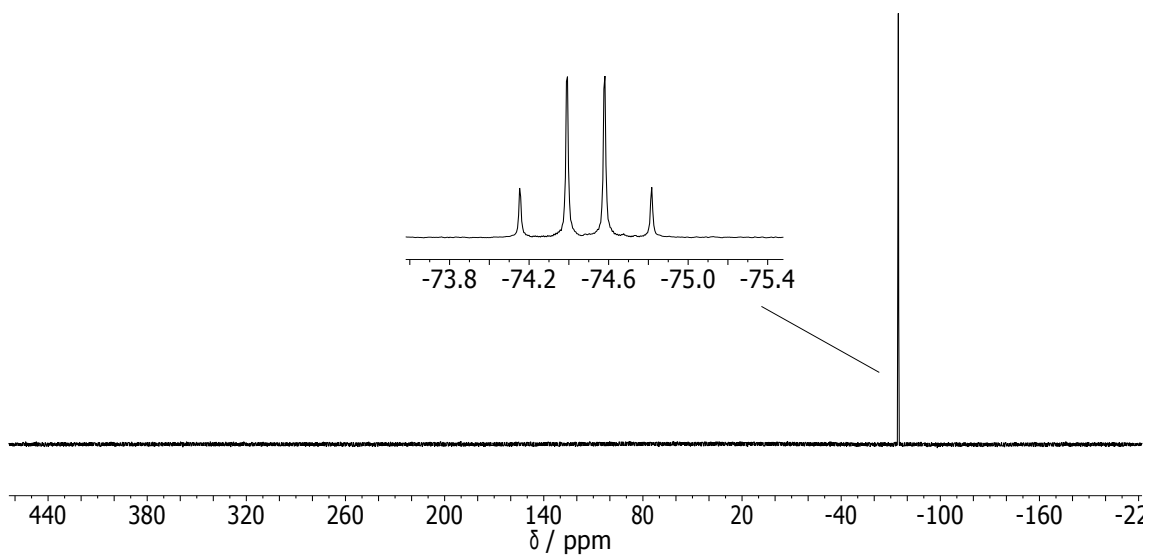

$^{31}\text{P}$  NMR spectrum

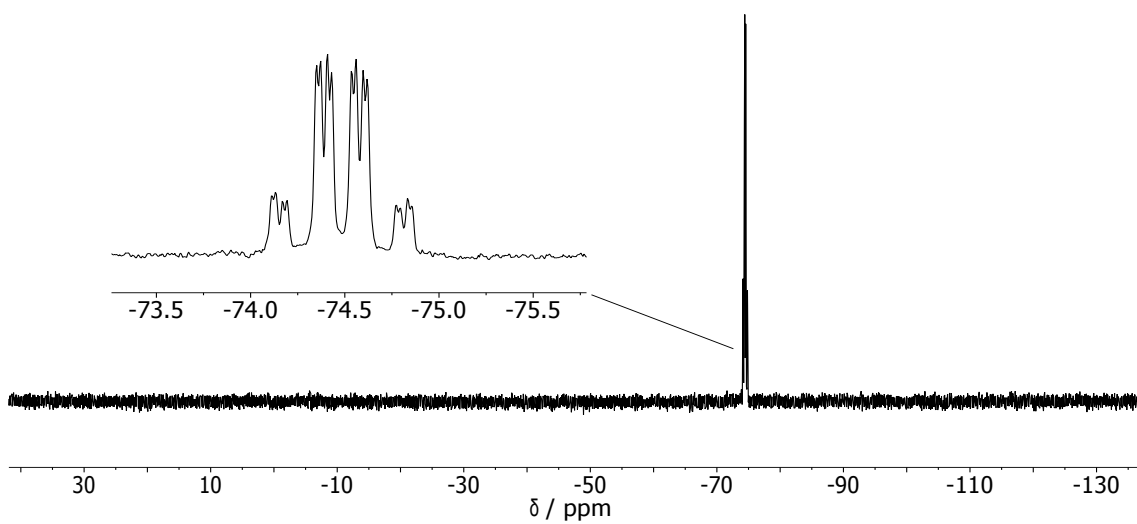

### Figure 7a-d NMR spectra of 4

$^1\text{H}$  NMR spectrum

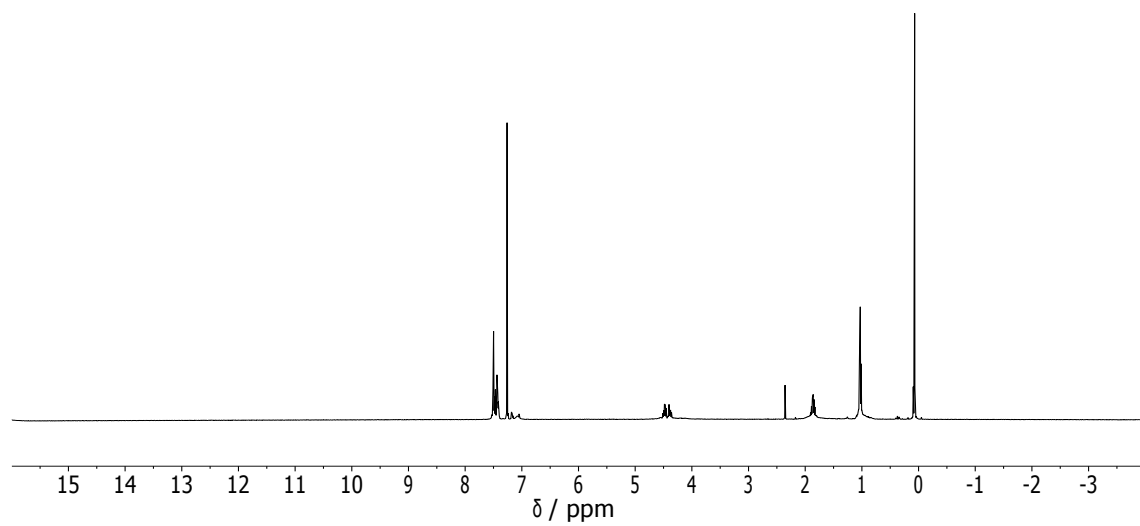

$^{13}\text{C}$  NMR spectrum

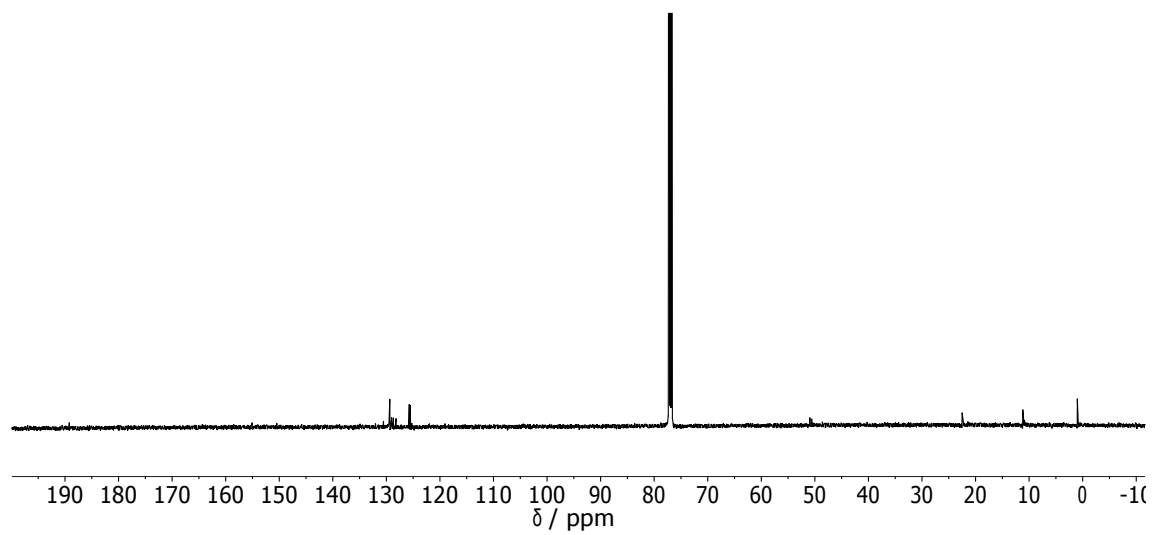

$^{31}\text{P}\{^1\text{H}\}$  spectrum

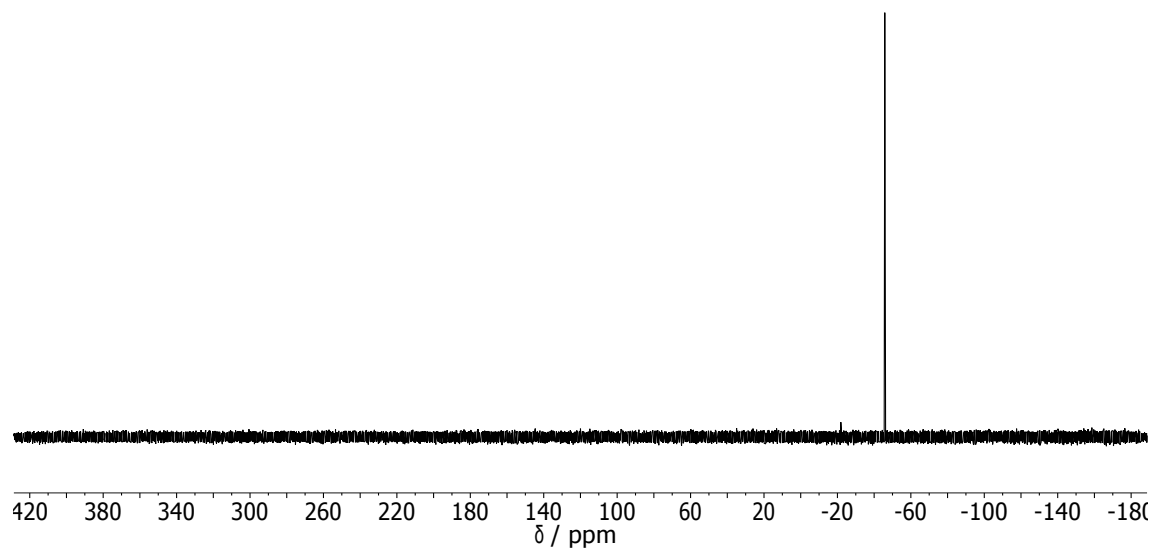

$^{31}\text{P}$  NMR spectrum

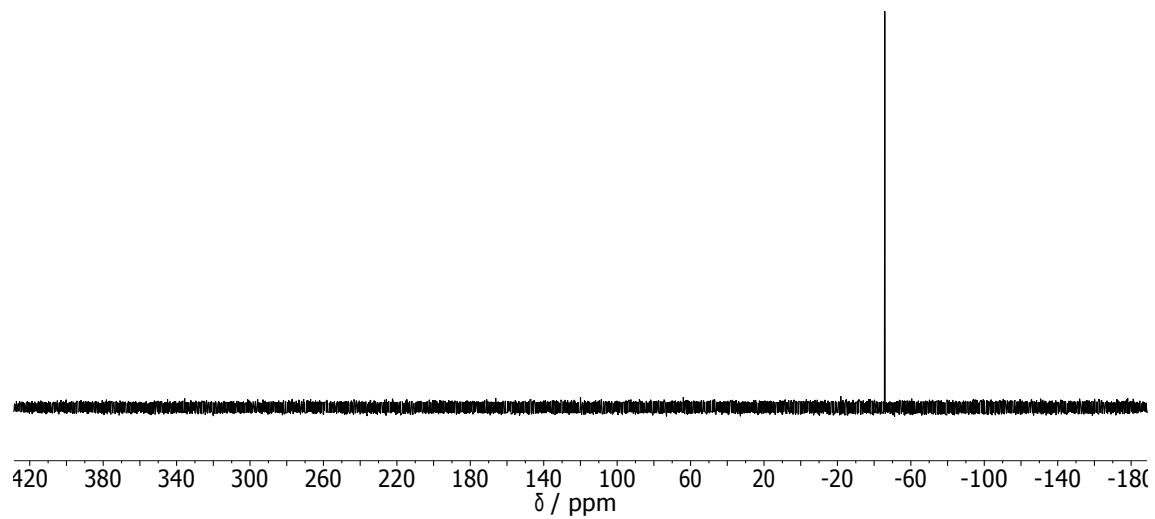

### 1.7 Simulated $^{31}\text{P}$ NMR spectrum of **3**

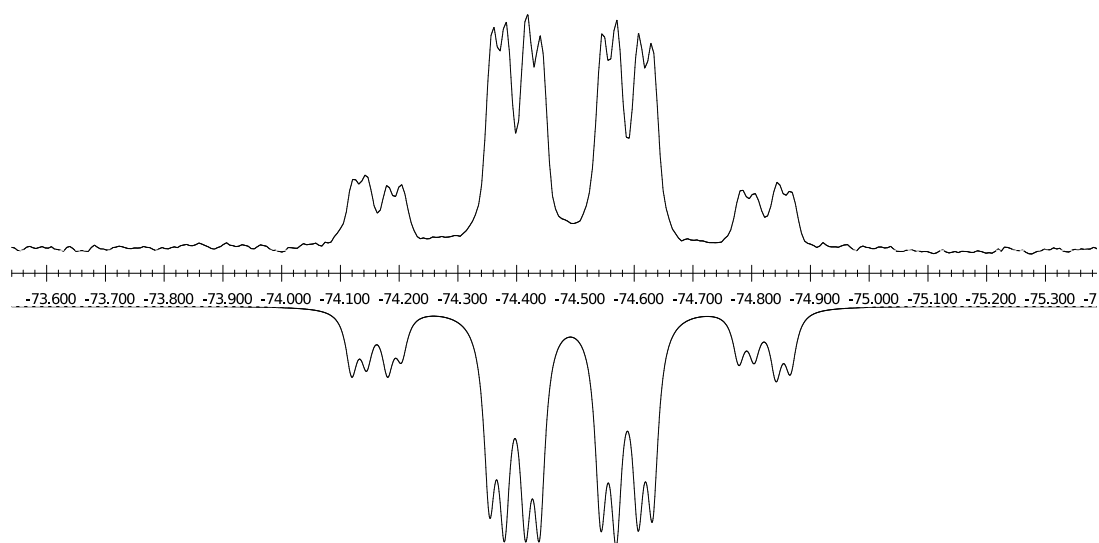

**Figure 8:** Comparison of experimental (top) and simulated  $^{31}\text{P}$  NMR spectrum of **3**.

### 1.8 UV/vis spectra

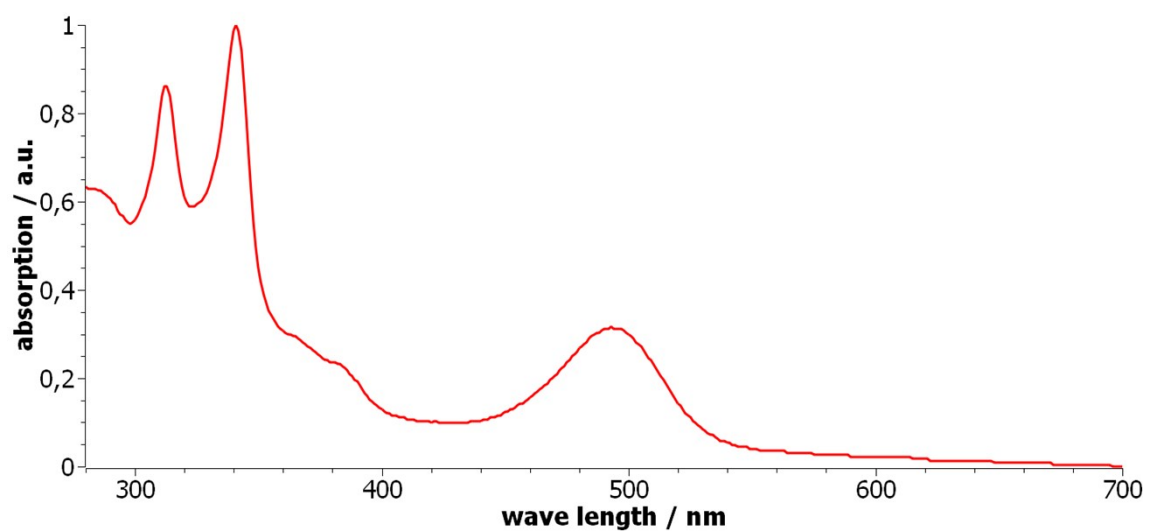

**Figure 9** UV/vis spectrum of **1** in recondensed  $\text{CH}_2\text{Cl}_2$ .



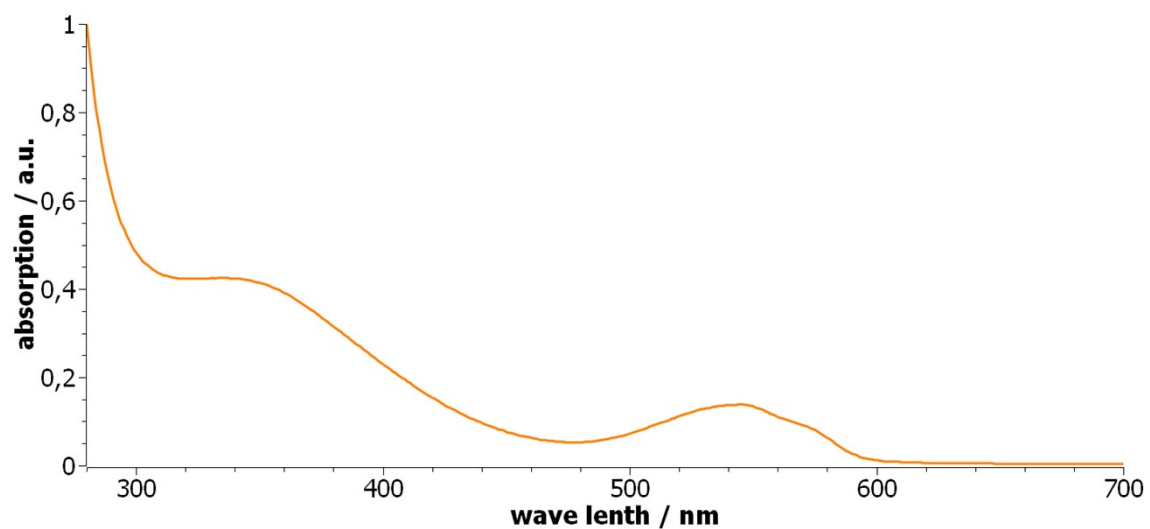

**Figure 10** UV/vis spectrum of 4-phenyl-1,2,4-triazoline-3,5-dione in recondensed CH<sub>2</sub>Cl<sub>2</sub>.

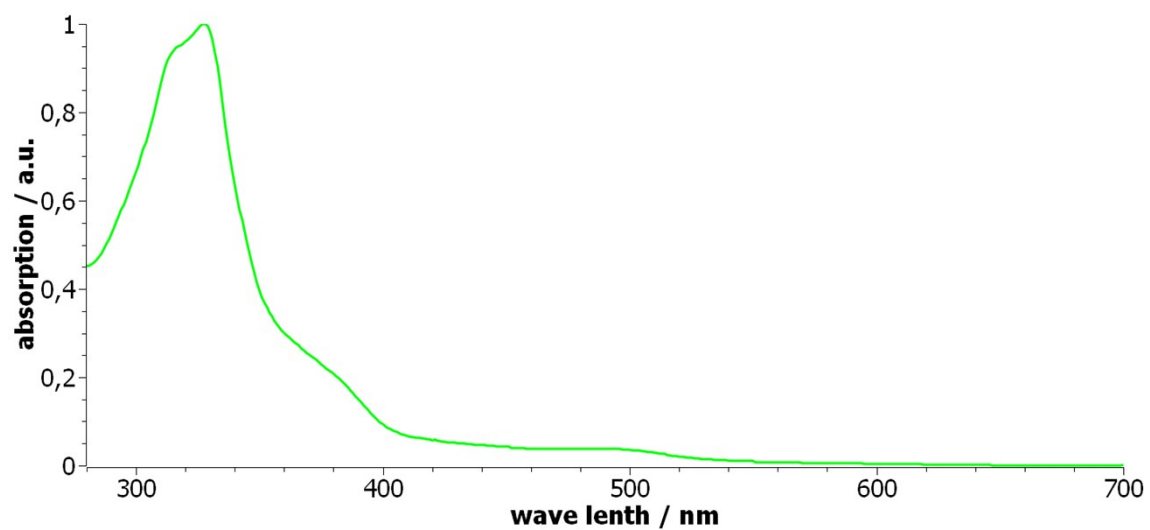

**Figure 11** UV/vis spectrum of 4 in recondensed CH<sub>2</sub>Cl<sub>2</sub>.

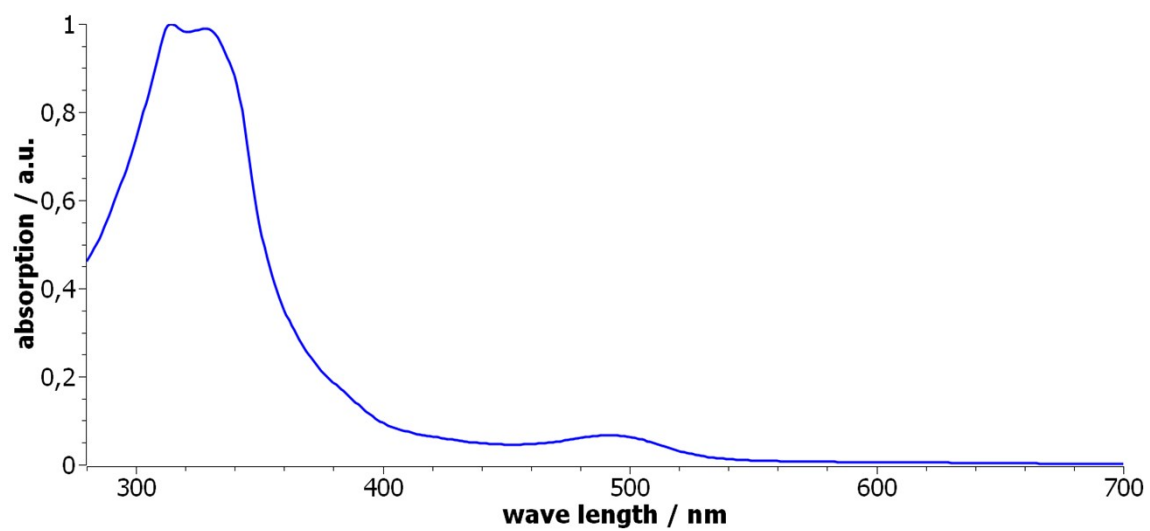

**Figure 12** UV/vis spectrum of an irradiated mixture of **4** in recondensed  $\text{CH}_2\text{Cl}_2$ .

## 2 Crystal structure data

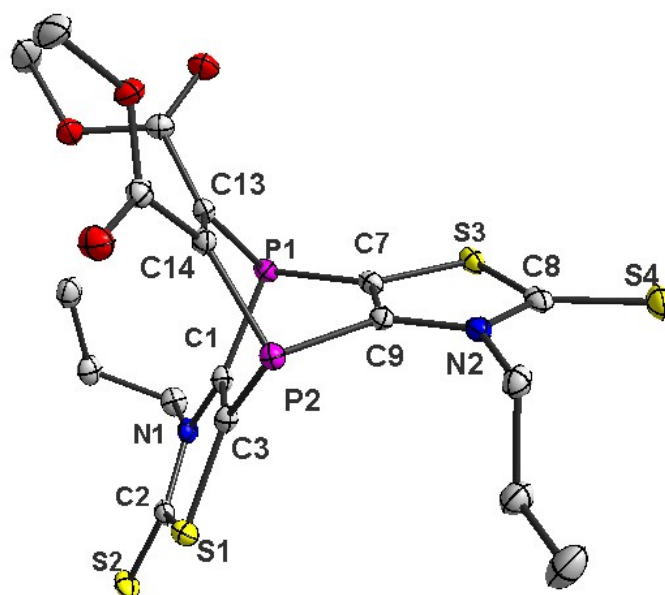

**Figure 13** Molecular structure of **2**. Ellipsoids are set to 50 % probability and hydrogen atoms are omitted for clarity. Selected bond lengths (Å) and angles (°) P1-C1 1.846(3), P1-C7 1.818(3), C1-C3 1.348(4), P1-C13 1.870(3), C13-C14 1.336(4), C1-P1-C7 95.63(13).

**Crystal data for 2:** The compound was crystallized by cooling a toluene solution of **2** to – 30 °C. Data were collected with a Bruker X8-KappaApexII diffractometer equipped with a low-temperature device at 100 K by using graphite monochromated Mo K $\alpha$  radiation ( $\lambda=0.71073$  Å). The structure was solved by Patterson methods (SHELXS-97) and refined by full-matrix least-squares on F2(SHELXL-97). C<sub>18</sub>H<sub>20</sub>N<sub>2</sub>O<sub>4</sub>P<sub>2</sub>S<sub>4</sub>, M = 518.54, crystal dimensions 0.24 × 0.14 × 0.08 mm<sup>3</sup>, triclinic, space group P -1, Z=2, a= 10.1125(6) Å, b= 10.1260(6) Å, c= 11.9070(7) Å,  $\alpha= 77.826(3)^\circ$ ,  $\beta= 75.301(3)^\circ$ ,  $\gamma= 89.011(3)^\circ$ , V=1151.99(12) Å<sup>3</sup>,  $d_c= 1.495$  g cm<sup>-3</sup>,  $\mu=0.579$  mm<sup>-1</sup>, T=100 K, transmission factors (min./max.) 0.6499/0.7460, empirical absorption correction,  $2\theta_{max}= 51.034^\circ$ , no. of unique data 5556,  $R_{int}= 0.0723$ , R1 (for  $I > 2\sigma(I)$ )=0.0515, wR2 (for all data)= 0.1105, final R= 0.0710, goodness of fit 1.061,  $\Delta F(max./min.)= 0.54/-0.44$  e Å<sup>-3</sup>.

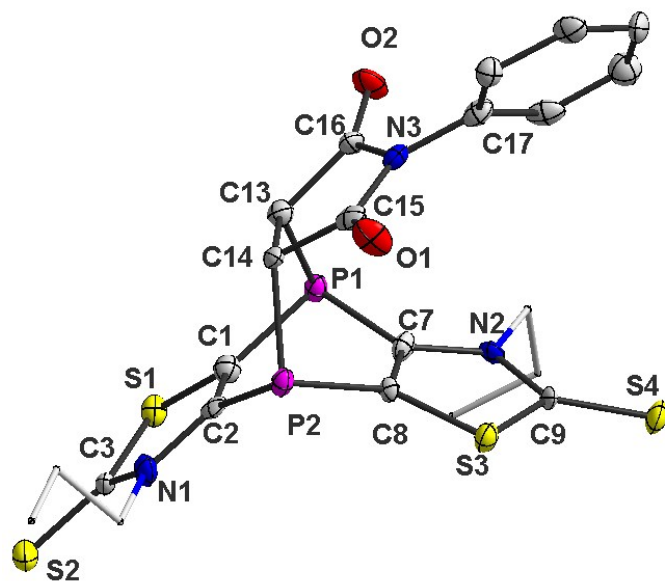

**Figure 14** Diamond plot of (reduced) molecular structure of **3** in solid state. Thermal ellipsoids are drawn at a 50 % probability level. Hydrogen atoms have been omitted for clarity.

### 3 Theoretical Investigations and computational details

All calculations were carried out with the Gaussian 09 program package.<sup>[1]</sup> Full geometry optimization calculations were performed, followed by calculation of the second derivatives at the optimized structures to establish the nature of the stationary points obtained. The Gibbs free energies were calculated based on the harmonic vibrational frequencies (atmospheric pressure, 298.15 K). **1**, **2**, **3**, **4** and their derivatives were calculated with methyl substituents at the nitrogen atoms (instead of *n*-propyl) to reduce the computational time and they were labeled by the special character '.

| substrate                           | <b>1'</b> +substrate | Van der Waals complex of <b>1'</b> +substrate | TS   | product |
|-------------------------------------|----------------------|-----------------------------------------------|------|---------|
| DMAD                                | 2.0                  | 0.0                                           | 17.0 | -13.7   |
| 1-phenylpyrrole-1,5-dione           | 5.9                  | 0.0                                           | 15.6 | -2.6    |
| 4-phenyl-1,2,4-triazoline-3,5-dione | 5.0                  | 0.0                                           | 5.6  | -15.6   |

**Table 1** Gibbs free energies (in kcal/mol unit and at B3LYP-D3/6-311+G\*\* level of theory) of the cycloaddition and the corresponding transition states (TS)

| Level of theory                     | <b>1'</b> +4-phenyl-1,2,4-triazoline-3,5-dione | Van der Waals complex of <b>1'</b> +substrate | product |
|-------------------------------------|------------------------------------------------|-----------------------------------------------|---------|
| B3LYP-D3/6-311+G**                  | 5.0                                            | 0.0                                           | -15.6   |
| B3LYP-D3/6-311+G**<br>(PCM=toluene) | 3.7                                            | 0.0                                           | -17.6   |
| $\omega$ B97XD/6-311+G**            | 5.3                                            | 0.0                                           | -23.4   |
| BP86/6-311+G**                      | 1.9                                            | 0.0                                           | -15.1   |
| M06-2X/6-311+G**                    | 4.6                                            | 0.0                                           | -22.5   |

**Table 2.** Gibbs free energies (in kcal/mol unit) of the cycloaddition and the corresponding transition state (TS) in the presence of 4-phenyl-1,2,4-triazoline-3,5-dione



## XYZ matrix and total energies of the investigated systems

1'

G(B3LYP-D3/6-311+G\*\*)= -2693.620174

E(B3LYP-D3/6-311+G\*\*)= -2693.707670

|   |           |           |           |
|---|-----------|-----------|-----------|
| C | 0.012449  | 0.000000  | 0.002511  |
| C | 0.015389  | 0.000000  | 1.407811  |
| N | 1.308886  | 0.000000  | 1.941337  |
| C | 2.350017  | 0.000000  | 1.039155  |
| S | 1.676368  | 0.000000  | -0.592404 |
| P | -1.379774 | 0.000000  | 2.489375  |
| C | -2.692986 | 0.000000  | 1.335531  |
| S | -4.356904 | 0.000000  | 1.930445  |
| C | -5.030554 | 0.000000  | 0.298886  |
| N | -3.989422 | 0.000000  | -0.603295 |
| C | -2.695925 | 0.000000  | -0.069770 |
| P | -1.300763 | 0.000000  | -1.151333 |
| C | -4.219648 | 0.000000  | -2.046814 |
| S | -6.656678 | 0.000000  | -0.002463 |
| C | 1.539112  | 0.000000  | 3.384855  |
| S | 3.976142  | 0.000000  | 1.340504  |
| H | -5.291791 | 0.000000  | -2.221814 |
| H | -3.777313 | 0.891469  | -2.496620 |
| H | -3.777313 | -0.891469 | -2.496620 |
| H | 2.611255  | 0.000000  | 3.559855  |
| H | 1.096777  | 0.891469  | 3.834661  |
| H | 1.096777  | -0.891469 | 3.834661  |

G( $\omega$ B97XD/6-311+G\*\*)= -2693.323553

E( $\omega$ B97XD/6-311+G\*\*)= -2693.413610

|   |           |          |           |
|---|-----------|----------|-----------|
| S | 0.003670  | 0.000000 | -0.001323 |
| C | 0.003999  | 0.000000 | 1.755436  |
| C | 1.322544  | 0.000000 | 2.225212  |
| N | 2.256315  | 0.000000 | 1.188212  |
| C | 1.754322  | 0.000000 | -0.085777 |
| P | -1.510238 | 0.000000 | 2.600493  |
| C | -0.962158 | 0.000000 | 4.261083  |
| N | -1.895915 | 0.000000 | 5.298087  |
| C | -1.393906 | 0.000000 | 6.572074  |
| S | 0.356729  | 0.000000 | 6.487620  |
| C | 0.356409  | 0.000000 | 4.730845  |
| C | -3.325200 | 0.000000 | 5.030309  |
| P | 1.870628  | 0.000000 | 3.885812  |
| S | -2.220418 | 0.000000 | 7.995997  |
| C | 3.685599  | 0.000000 | 1.455996  |
| S | 2.580833  | 0.000000 | -1.509694 |
| H | 4.210481  | 0.000000 | 0.504240  |

|   |           |           |          |
|---|-----------|-----------|----------|
| H | 3.960475  | 0.891903  | 2.023463 |
| H | 3.960475  | -0.891903 | 2.023463 |
| H | -3.850075 | 0.000000  | 5.982069 |
| H | -3.600077 | 0.891903  | 4.462842 |
| H | -3.600077 | -0.891902 | 4.462842 |

G(M06-2X/6-311+G\*\*) = -2693.245395

E(M06-2X/6-311+G\*\*) = -2693.335263

|   |           |           |           |
|---|-----------|-----------|-----------|
| S | 0.000313  | 0.000000  | -0.000132 |
| C | 0.000365  | 0.000000  | 1.755969  |
| C | 1.319765  | 0.000000  | 2.226642  |
| N | 2.252006  | 0.000000  | 1.188249  |
| C | 1.752106  | 0.000000  | -0.086286 |
| P | -1.517929 | 0.000000  | 2.598673  |
| C | -0.959401 | 0.000000  | 4.259625  |
| N | -1.891600 | 0.000000  | 5.298030  |
| C | -1.391656 | 0.000000  | 6.572550  |
| S | 0.360087  | 0.000000  | 6.486414  |
| C | 0.360065  | 0.000000  | 4.730258  |
| C | -3.322873 | 0.000000  | 5.027666  |
| P | 1.878329  | 0.000000  | 3.887621  |
| S | -2.219087 | 0.000000  | 7.994281  |
| C | 3.683262  | 0.000000  | 1.458666  |
| S | 2.579546  | 0.000000  | -1.507997 |
| H | 4.208661  | 0.000000  | 0.508405  |
| H | 3.952377  | 0.891012  | 2.029002  |
| H | 3.952377  | -0.891012 | 2.029002  |
| H | -3.848244 | 0.000000  | 5.977946  |
| H | -3.592026 | 0.891017  | 4.457358  |
| H | -3.592027 | -0.891016 | 4.457358  |

G(BP86/6-311+G\*\*) = -2693.775777

E(BP86/6-311+G\*\*) = -2693.858644

|   |           |          |           |
|---|-----------|----------|-----------|
| C | 0.016694  | 0.000000 | -0.006197 |
| C | 0.017190  | 0.000000 | 1.407776  |
| N | 1.311976  | 0.000000 | 1.944455  |
| C | 2.365592  | 0.000000 | 1.039272  |
| S | 1.685287  | 0.000000 | -0.600163 |
| P | -1.377557 | 0.000000 | 2.505906  |
| C | -2.697234 | 0.000000 | 1.344240  |
| S | -4.365823 | 0.000000 | 1.938206  |
| C | -5.046131 | 0.000000 | 0.298766  |
| N | -3.992513 | 0.000000 | -0.606413 |
| C | -2.697726 | 0.000000 | -0.069732 |
| P | -1.302979 | 0.000000 | -1.167862 |



|   |           |           |           |
|---|-----------|-----------|-----------|
| C | -4.224319 | 0.000000  | -2.051505 |
| S | -6.674623 | 0.000000  | -0.017347 |
| C | 1.543785  | 0.000000  | 3.389546  |
| S | 3.994086  | 0.000000  | 1.355386  |
| H | -5.309564 | 0.000000  | -2.214959 |
| H | -3.778945 | 0.898673  | -2.506694 |
| H | -3.778945 | -0.898673 | -2.506694 |
| H | 2.629030  | 0.000000  | 3.552998  |
| H | 1.098411  | 0.898673  | 3.844736  |
| H | 1.098411  | -0.898673 | 3.844736  |

PCM=toluene

G(B3LYP-D3/6-311+G\*\*)= -2693.620174

E(B3LYP-D3/6-311+G\*\*)= -2693.712914

|   |           |           |           |
|---|-----------|-----------|-----------|
| C | 0.010034  | -0.000000 | 0.002694  |
| C | 0.014221  | 0.000000  | 1.407735  |
| N | 1.309330  | 0.000000  | 1.940524  |
| C | 2.343546  | 0.000000  | 1.037957  |
| S | 1.674397  | -0.000000 | -0.591427 |
| P | -1.378980 | 0.000000  | 2.490650  |
| C | -2.690570 | 0.000000  | 1.335347  |
| S | -4.354934 | 0.000000  | 1.929469  |
| C | -5.024083 | 0.000000  | 0.300084  |
| N | -3.989867 | -0.000000 | -0.602482 |
| C | -2.694757 | -0.000000 | -0.069694 |
| P | -1.301556 | -0.000000 | -1.152608 |
| C | -4.218778 | -0.000000 | -2.047956 |
| S | -6.657709 | -0.000000 | 0.001741  |
| C | 1.538241  | 0.000000  | 3.385997  |
| S | 3.977173  | 0.000000  | 1.336301  |
| H | -5.289780 | -0.000000 | -2.226522 |
| H | -3.776238 | 0.892099  | -2.495087 |
| H | -3.776238 | -0.892099 | -2.495087 |
| H | 2.609244  | 0.000000  | 3.564564  |
| H | 1.095701  | 0.892099  | 3.833129  |
| H | 1.095701  | -0.892099 | 3.833129  |

**DMAD**

G(B3LYP-D3/6-311+G\*\*)= -533.172168

E(B3LYP-D3/6-311+G\*\*)= -533.247813

|   |           |           |           |
|---|-----------|-----------|-----------|
| C | -0.003868 | -0.005249 | -0.017880 |
| O | -0.002202 | -0.012767 | 1.427619  |
| C | 1.208516  | 0.009282  | 2.004264  |
| O | 2.260971  | 0.031379  | 1.414988  |
| C | 1.097869  | 0.003124  | 3.447200  |
| C | 1.083897  | -0.006989 | 4.651187  |
| C | 1.055089  | 0.074192  | 6.095806  |

|   |           |           |           |
|---|-----------|-----------|-----------|
| O | 0.997208  | 1.113548  | 6.705544  |
| O | 1.100912  | -1.146993 | 6.648484  |
| C | 1.080751  | -1.177829 | 8.093533  |
| H | -1.053139 | -0.027140 | -0.301226 |
| H | 0.480990  | 0.898159  | -0.390413 |
| H | 0.521123  | -0.881749 | -0.400133 |
| H | 1.121867  | -2.231907 | 8.356138  |
| H | 1.943307  | -0.643203 | 8.493765  |
| H | 0.164710  | -0.718687 | 8.467756  |

### 1-phenylpyrrole-1,5-dione

G(B3LYP-D3/6-311+G\*\*) = -590.544191

E(B3LYP-D3/6-311+G\*\*) = -590.656443

|   |           |           |           |
|---|-----------|-----------|-----------|
| N | 0.097083  | -0.007469 | -0.225271 |
| C | -0.064169 | 0.017606  | 1.174692  |
| C | 1.318591  | -0.008652 | 1.754924  |
| C | 2.203970  | -0.045161 | 0.761464  |
| C | 1.469724  | -0.047208 | -0.546011 |
| O | 1.945011  | -0.076030 | -1.653450 |
| H | 3.283016  | -0.073592 | 0.799630  |
| H | 1.479910  | 0.005904  | 2.822777  |
| O | -1.109743 | 0.052175  | 1.774178  |
| C | -0.968005 | 0.003833  | -1.175336 |
| C | -2.092160 | -0.796710 | -0.965747 |
| C | -3.131269 | -0.775659 | -1.892026 |
| C | -3.046497 | 0.025842  | -3.029245 |
| C | -1.916870 | 0.816207  | -3.234582 |
| C | -0.878268 | 0.815338  | -2.307588 |
| H | -2.156841 | -1.414800 | -0.080840 |
| H | -4.006712 | -1.392143 | -1.723913 |
| H | -3.855327 | 0.034501  | -3.750686 |
| H | -1.842222 | 1.441167  | -4.116962 |
| H | 0.000756  | 1.424852  | -2.466097 |

### 4-phenyl-1,2,4-triazoline-3,5-dione

G(B3LYP-D3/6-311+G\*\*) = -622.617826

E(B3LYP-D3/6-311+G\*\*) = -622.705773

|   |           |           |           |
|---|-----------|-----------|-----------|
| C | 0.003444  | -0.022217 | -0.007855 |
| N | 0.004581  | -0.000048 | 1.381071  |
| C | 1.321512  | 0.022084  | 1.822445  |
| N | 2.170353  | 0.012956  | 0.581967  |
| N | 1.449034  | -0.013475 | -0.419674 |
| C | -1.157709 | -0.000010 | 2.218080  |
| C | -2.250103 | 0.794900  | 1.873671  |
| C | -3.378422 | 0.785658  | 2.689010  |

|   |           |           |           |
|---|-----------|-----------|-----------|
| C | -3.409874 | 0.000071  | 3.839961  |
| C | -2.308349 | -0.785556 | 4.175008  |
| C | -1.177386 | -0.794880 | 3.363340  |
| O | 1.758144  | 0.038565  | 2.930091  |
| O | -0.908657 | -0.038832 | -0.773096 |
| H | -0.318212 | -1.399110 | 3.621610  |
| H | -2.326476 | -1.397505 | 5.068983  |
| H | -4.289222 | 0.000102  | 4.473217  |
| H | -4.232009 | 1.397638  | 2.422794  |
| H | -2.222668 | 1.399099  | 0.976917  |

G( $\omega$ B97XD/6-311+G\*\*)= -622.617826

E( $\omega$ B97XD/6-311+G\*\*)= -622.473663

|   |           |           |           |
|---|-----------|-----------|-----------|
| C | -0.002686 | -0.002444 | 0.004804  |
| C | -0.000175 | -0.000056 | 1.393953  |
| C | 1.188590  | 0.002374  | 2.112687  |
| C | 2.393731  | -0.004723 | 1.423558  |
| C | 2.406445  | 0.000028  | 0.033846  |
| C | 1.209343  | 0.004735  | -0.672136 |
| N | -1.243097 | -0.000110 | 2.096396  |
| C | -1.572762 | -0.827737 | 3.154584  |
| N | -2.964494 | -0.453784 | 3.545779  |
| N | -3.372599 | 0.453675  | 2.823748  |
| C | -2.319760 | 0.827421  | 1.832969  |
| O | -0.936455 | -1.671793 | 3.691191  |
| O | -2.451209 | 1.671667  | 1.011243  |
| H | 1.171688  | -0.000334 | 3.195234  |
| H | 3.324603  | -0.009548 | 1.978009  |
| H | 3.349940  | 0.000060  | -0.499373 |
| H | 1.214539  | 0.009592  | -1.755607 |
| H | -0.938803 | 0.000228  | -0.539142 |

G(M06-2X/6-311+G\*\*)= -622.617826

E(M06-2X /6-311+G\*\*)= -622.454004

|   |           |           |           |
|---|-----------|-----------|-----------|
| C | -0.002116 | 0.053724  | 0.003407  |
| C | 0.001185  | -0.000067 | 1.393174  |
| C | 1.190070  | -0.053808 | 2.112913  |
| C | 2.395169  | -0.059275 | 1.421689  |
| C | 2.409317  | 0.000037  | 0.032227  |
| C | 1.211692  | 0.059294  | -0.672406 |
| N | -1.242496 | -0.000134 | 2.096039  |
| C | -1.541135 | -0.763276 | 3.211796  |
| N | -2.952290 | -0.417652 | 3.578267  |
| N | -3.394112 | 0.417609  | 2.796573  |
| C | -2.352474 | 0.762903  | 1.776343  |
| O | -0.874766 | -1.539692 | 3.806692  |
| O | -2.518336 | 1.539583  | 0.898829  |

|   |           |           |           |
|---|-----------|-----------|-----------|
| H | 1.170518  | -0.100882 | 3.193749  |
| H | 3.325008  | -0.106089 | 1.974739  |
| H | 3.352178  | 0.000078  | -0.500628 |
| H | 1.217561  | 0.106146  | -1.754268 |
| H | -0.938133 | 0.100752  | -0.537394 |

G(BP86/6-311+G\*\*)= -622.626139

E(BP86/6-311+G\*\*)= -622.709067

|   |           |           |           |
|---|-----------|-----------|-----------|
| C | -0.002595 | 0.019532  | -0.007458 |
| C | -0.001799 | -0.000039 | 1.394909  |
| C | 1.199200  | -0.019583 | 2.118953  |
| C | 2.413383  | -0.025186 | 1.422949  |
| C | 2.427520  | 0.000016  | 0.021919  |
| C | 1.219964  | 0.025190  | -0.688641 |
| N | -1.252073 | -0.000063 | 2.101533  |
| C | -1.570867 | -0.813902 | 3.193838  |
| N | -2.990828 | -0.447059 | 3.583373  |
| N | -3.418494 | 0.446778  | 2.826698  |
| C | -2.352305 | 0.813760  | 1.811244  |
| O | -0.911250 | -1.646234 | 3.758771  |
| O | -2.496094 | 1.646049  | 0.954713  |
| H | 1.183165  | -0.038916 | 3.209586  |
| H | 3.351648  | -0.045328 | 1.982263  |
| H | 3.378709  | 0.000037  | -0.515670 |
| H | 1.224769  | 0.045354  | -1.780955 |
| H | -0.945214 | 0.038844  | -0.556284 |

PCM=toluene

G(B3LYP-D3/6-311+G\*\*)= -622.623140

E(B3LYP-D3/6-311+G\*\*)= -622.710887

|   |           |           |           |
|---|-----------|-----------|-----------|
| C | -0.003089 | 0.005366  | 0.000107  |
| C | 0.000536  | -0.000034 | 1.393583  |
| C | 1.192453  | -0.005410 | 2.115471  |
| C | 2.401148  | -0.011724 | 1.424010  |
| C | 2.413851  | 0.000013  | 0.029649  |
| C | 1.212754  | 0.011725  | -0.678706 |
| N | -1.247023 | -0.000060 | 2.098673  |
| C | -1.571168 | -0.821724 | 3.166407  |
| N | -2.973656 | -0.450091 | 3.559689  |
| N | -3.389327 | 0.449839  | 2.824268  |
| C | -2.329000 | 0.821529  | 1.825597  |
| O | -0.927403 | -1.663096 | 3.711990  |
| O | -2.464371 | 1.662930  | 0.992703  |
| H | 1.173293  | -0.012918 | 3.197253  |
| H | 3.332088  | -0.021240 | 1.978059  |
| H | 3.357186  | 0.000033  | -0.503496 |

|   |           |          |           |
|---|-----------|----------|-----------|
| H | 1.218295  | 0.021259 | -1.762029 |
| H | -0.939729 | 0.012853 | -0.541487 |

### Van der waals complex of 1' and DMAD

G(B3LYP-D3/6-311+G\*\*)= -3226.795580

E(B3LYP-D3/6-311+G\*\*)= -3226.976938

|   |           |           |           |
|---|-----------|-----------|-----------|
| C | 0.056006  | -0.204126 | 0.164493  |
| C | -0.092252 | -0.177467 | 1.561307  |
| S | 1.493120  | -0.293184 | 2.328387  |
| C | 2.328567  | -0.391617 | 0.777918  |
| N | 1.389910  | -0.335123 | -0.228604 |
| P | -1.520841 | -0.101797 | 2.565008  |
| C | -2.792408 | -0.088858 | 1.341618  |
| N | -4.133082 | -0.108059 | 1.733020  |
| C | -5.071992 | -0.057236 | 0.726435  |
| S | -4.229508 | 0.000356  | -0.822280 |
| C | -2.640941 | -0.044374 | -0.054402 |
| C | -4.516847 | -0.211437 | 3.140121  |
| P | -1.210329 | -0.075206 | -1.057599 |
| S | -6.720402 | -0.050591 | 0.860514  |
| S | 3.971016  | -0.530402 | 0.642352  |
| C | 1.764284  | -0.440682 | -1.638061 |
| C | -1.523196 | -3.511126 | 0.115976  |
| C | -1.519261 | -3.524951 | 1.318647  |
| C | -1.416642 | -3.558815 | 2.762969  |
| O | -0.381220 | -3.720224 | 3.358993  |
| C | -1.626765 | -3.503380 | -1.328654 |
| O | -2.671864 | -3.556644 | -1.927264 |
| O | -0.412111 | -3.432386 | -1.901506 |
| C | -0.414116 | -3.402659 | -3.346599 |
| O | -2.620265 | -3.390377 | 3.338746  |
| C | -2.616714 | -3.393136 | 4.784147  |
| H | 1.479796  | 0.469081  | -2.171753 |
| H | 2.842313  | -0.572236 | -1.690925 |
| H | 1.262481  | -1.303426 | -2.080281 |
| H | -5.602400 | -0.246387 | 3.191128  |
| H | -4.095320 | -1.125786 | 3.561985  |
| H | -4.151989 | 0.656586  | 3.694051  |
| H | 0.634542  | -3.397662 | -3.634411 |
| H | -0.919993 | -4.283334 | -3.743318 |
| H | -0.921007 | -2.503067 | -3.700203 |

|   |           |           |          |
|---|-----------|-----------|----------|
| H | -3.660787 | -3.299054 | 5.073294 |
| H | -2.193476 | -4.324846 | 5.160541 |
| H | -2.030277 | -2.551551 | 5.157051 |

### Van der waals complex of 1' and 1-phenylpyrrole-1,5-dione

G(B3LYP-D3/6-311+G\*\*) = -3284.173789

E(B3LYP-D3/6-311+G\*\*) = -3284.393497

|   |           |           |           |
|---|-----------|-----------|-----------|
| C | 0.000687  | -0.001090 | -0.000776 |
| C | 0.000966  | 0.000393  | 1.396992  |
| C | 1.208165  | 0.000645  | 2.098998  |
| C | 2.410045  | 0.018644  | 1.398641  |
| C | 2.418477  | 0.038966  | 0.006414  |
| C | 1.210860  | 0.025652  | -0.687816 |
| N | -1.241135 | 0.000275  | 2.107749  |
| C | -2.418637 | 0.641434  | 1.681559  |
| C | -3.468634 | 0.331907  | 2.703240  |
| C | -2.927006 | -0.413449 | 3.664080  |
| C | -1.489659 | -0.670188 | 3.328662  |
| O | -2.546851 | 1.322690  | 0.691009  |
| O | -0.698484 | -1.320899 | 3.963039  |
| C | -1.185344 | 4.305121  | 1.015953  |
| N | -0.736620 | 3.738050  | 2.290575  |
| C | -1.636045 | 3.428826  | 3.312070  |
| C | -1.008623 | 2.845504  | 4.427754  |
| S | 0.735073  | 2.788767  | 4.159748  |
| C | 0.594610  | 3.486950  | 2.542909  |
| P | -1.658964 | 2.188933  | 5.911568  |
| C | -3.379903 | 2.512001  | 5.690313  |
| C | -3.996360 | 3.167752  | 4.613900  |
| S | -5.743398 | 3.233949  | 4.884268  |
| C | -5.623222 | 2.374280  | 6.422146  |
| N | -4.297581 | 2.088153  | 6.658991  |
| P | -3.349816 | 3.812063  | 3.122138  |
| C | -3.865690 | 1.387510  | 7.868595  |
| S | -6.937599 | 2.011206  | 7.358714  |
| S | 1.897358  | 3.754332  | 1.566663  |
| H | -1.584377 | 5.309993  | 1.174877  |
| H | -0.325322 | 4.356122  | 0.353113  |
| H | -1.945888 | 3.656149  | 0.580998  |
| H | -3.219945 | 2.035649  | 8.465551  |
| H | -4.752038 | 1.126267  | 8.441517  |
| H | -3.319301 | 0.480861  | 7.598758  |
| H | -0.932325 | -0.007151 | -0.545019 |
| H | 1.204552  | 0.035359  | -1.771635 |
| H | 3.357946  | 0.066590  | -0.532971 |
| H | 3.342914  | 0.030932  | 1.949551  |

|   |           |           |          |
|---|-----------|-----------|----------|
| H | 1.208819  | -0.016425 | 3.177523 |
| H | -3.378618 | -0.823946 | 4.554604 |
| H | -4.478461 | 0.699567  | 2.603207 |

**Van der waals complex of 1' and 4-phenyl-1,2,4-triazoline-3,5-dione**

G(B3LYP-D3/6-311+G\*\*)= -3316.245889

E(B3LYP-D3/6-311+G\*\*)= -3316.440159

|   |           |           |           |
|---|-----------|-----------|-----------|
| C | 0.609886  | 0.493197  | -0.326122 |
| C | 0.937496  | 0.837048  | 0.998097  |
| N | 2.283548  | 1.188458  | 1.142372  |
| C | 3.059537  | 1.146804  | 0.005372  |
| S | 2.046995  | 0.633939  | -1.345546 |
| P | -0.129450 | 0.858179  | 2.402206  |
| C | -1.635216 | 0.353996  | 1.672447  |
| C | -1.960455 | 0.008390  | 0.352980  |
| N | -3.304592 | -0.364783 | 0.211692  |
| C | -4.067800 | -0.344812 | 1.351676  |
| S | -3.067094 | 0.189878  | 2.696826  |
| P | -0.892057 | -0.027253 | -1.049112 |
| S | -5.663662 | -0.766471 | 1.535811  |
| C | -3.853605 | -0.773173 | -1.083965 |
| C | 2.838012  | 1.579928  | 2.438214  |
| S | 4.667535  | 1.499947  | -0.155011 |
| O | -4.072021 | -3.939196 | -0.232891 |
| C | -3.589286 | -3.731876 | 0.837906  |
| N | -4.046885 | -4.035075 | 2.106896  |
| C | -3.128097 | -3.561785 | 3.036247  |
| N | -2.015052 | -2.944834 | 2.233975  |
| N | -2.269688 | -3.041181 | 1.029007  |
| C | -5.281679 | -4.693274 | 2.416120  |
| C | -5.304578 | -5.661268 | 3.419051  |
| C | -6.506077 | -6.297484 | 3.718194  |
| C | -7.666203 | -5.976165 | 3.015383  |
| C | -7.625672 | -5.009380 | 2.012120  |
| C | -6.434091 | -4.356877 | 1.708506  |
| O | -3.141448 | -3.615388 | 4.224997  |
| H | 3.893768  | 1.799896  | 2.300388  |
| H | 2.722417  | 0.763320  | 3.154437  |
| H | -4.915131 | -0.966680 | -0.954294 |
| H | 2.322595  | 2.468174  | 2.810729  |
| H | -3.709189 | 0.027850  | -1.811594 |
| H | -3.360033 | -1.685281 | -1.422912 |
| H | -6.397177 | -3.597451 | 0.940529  |
| H | -8.525249 | -4.753390 | 1.465005  |
| H | -8.598425 | -6.476718 | 3.249678  |
| H | -6.531492 | -7.046779 | 4.500481  |

H -4.401951 -5.902336 3.964400

G( $\omega$ B97XD/6-311+G\*\*) = -3315.715950

E( $\omega$ B97XD/6-311+G\*\*) = -3315.917049

C -0.062418 -0.118037 -0.007718

C 0.003051 0.037068 1.381438

N 1.311372 0.080547 1.851285

C 2.301184 -0.021812 0.909692

S 1.561386 -0.185656 -0.669152

P -1.324106 0.179612 2.514139

C -2.678753 -0.003814 1.444067

C -2.742055 -0.224826 0.064324

N -4.056004 -0.346958 -0.395119

C -5.042237 -0.180436 0.535092

S -4.307170 0.088253 2.101292

P -1.412888 -0.325942 -1.070877

S -6.676634 -0.226911 0.309276

C -4.347588 -0.644180 -1.791236

C 1.605604 0.171648 3.273544

S 3.930479 0.000811 1.140464

O -3.287555 -3.660791 -0.471472

C -2.617257 -3.525552 0.500170

N -2.946752 -3.643575 1.834945

C -1.824603 -3.348520 2.589598

N -0.737967 -3.055251 1.610242

N -1.170723 -3.168313 0.462512

C -4.228065 -4.014370 2.351355

C -4.303730 -4.906565 3.414207

C -5.551749 -5.254867 3.912491

C -6.706872 -4.724457 3.349308

C -6.614486 -3.838587 2.283076

C -5.373245 -3.478167 1.779018

O -1.674803 -3.336094 3.766178

H 2.686453 0.151093 3.393568

H 1.158972 -0.677904 3.795935

H -5.427829 -0.704760 -1.901713

H 1.209474 1.104941 3.680389

H -3.959158 0.151414 -2.431147

H -3.892527 -1.599155 -2.062571

H -5.306857 -2.792277 0.946338

H -7.506132 -3.412695 1.838740

H -7.677843 -5.002684 3.741985

H -5.618803 -5.947477 4.743035

H -3.402731 -5.314660 3.853597

G(M06-2X/6-311+G\*\*) = -3315.616594

E(M06-2X/6-311+G\*\*) = -3315.819076



|   |           |           |           |
|---|-----------|-----------|-----------|
| C | -0.051139 | -0.025502 | 0.020296  |
| C | -0.076290 | -0.029871 | 1.421249  |
| N | 1.197172  | -0.049897 | 1.976060  |
| C | 2.249132  | -0.046168 | 1.097772  |
| S | 1.613511  | -0.021359 | -0.536156 |
| P | -1.473501 | -0.007627 | 2.484661  |
| C | -2.752215 | -0.097662 | 1.310083  |
| C | -2.727584 | -0.164594 | -0.088218 |
| N | -4.003908 | -0.285321 | -0.638598 |
| C | -5.046609 | -0.314324 | 0.242091  |
| S | -4.416301 | -0.161626 | 1.871365  |
| P | -1.327675 | -0.123947 | -1.147406 |
| S | -6.655799 | -0.479845 | -0.077707 |
| C | -4.193312 | -0.475139 | -2.072887 |
| C | 1.389026  | -0.148914 | 3.418417  |
| S | 3.857541  | -0.059122 | 1.436606  |
| O | -3.662191 | -3.262274 | -0.465300 |
| C | -2.853566 | -3.276027 | 0.404176  |
| N | -2.991138 | -3.534762 | 1.755797  |
| C | -1.754087 | -3.350653 | 2.355433  |
| N | -0.804957 | -3.002640 | 1.251513  |
| N | -1.406013 | -2.986858 | 0.178961  |
| C | -4.197111 | -3.934306 | 2.420900  |
| C | -4.113939 | -4.747527 | 3.548390  |
| C | -5.285095 | -5.129016 | 4.191449  |
| C | -6.522253 | -4.711027 | 3.713679  |
| C | -6.588206 | -3.908467 | 2.580457  |
| C | -5.428233 | -3.514314 | 1.925402  |
| O | -1.425786 | -3.459355 | 3.489202  |
| H | 2.456363  | -0.204747 | 3.612855  |
| H | 0.892108  | -1.050304 | 3.785313  |
| H | -5.260064 | -0.552118 | -2.263054 |
| H | 0.968949  | 0.730761  | 3.910167  |
| H | -3.778500 | 0.376999  | -2.614222 |
| H | -3.694109 | -1.396976 | -2.378666 |
| H | -5.493913 | -2.898929 | 1.039478  |
| H | -7.544188 | -3.575044 | 2.195632  |
| H | -7.430491 | -5.011882 | 4.221178  |
| H | -5.224005 | -5.758938 | 5.070295  |
| H | -3.153191 | -5.070585 | 3.923634  |

G(BP86/6-311+G\*\*) = -622.617826

E(BP86/6-311+G\*\*) = -3316.580597

|   |          |           |           |
|---|----------|-----------|-----------|
| C | 4.117259 | 0.634050  | -0.449446 |
| C | 4.210310 | -0.352580 | 0.561010  |
| N | 5.459147 | -0.985951 | 0.579176  |
| C | 6.388499 | -0.567285 | -0.364719 |

|   |           |           |           |
|---|-----------|-----------|-----------|
| S | 5.643798  | 0.711958  | -1.344147 |
| P | 2.973495  | -0.838016 | 1.736007  |
| C | 1.662487  | 0.239448  | 1.275379  |
| C | 1.570437  | 1.227446  | 0.269405  |
| N | 0.321757  | 1.864256  | 0.255966  |
| C | -0.604814 | 1.421959  | 1.178199  |
| S | 0.128462  | 0.145982  | 2.154249  |
| P | 2.804389  | 1.704543  | -0.914014 |
| S | -2.173609 | 1.949845  | 1.386912  |
| C | -0.004645 | 2.912614  | -0.716704 |
| C | 5.773683  | -2.042369 | 1.543738  |
| S | 7.935178  | -1.118420 | -0.594152 |
| O | -3.990928 | 1.537054  | -1.995335 |
| C | -3.489371 | 0.557451  | -1.506482 |
| N | -4.091041 | -0.559435 | -0.913558 |
| C | -3.096711 | -1.488844 | -0.594417 |
| N | -1.794195 | -0.867119 | -1.025385 |
| N | -2.007719 | 0.269453  | -1.505813 |
| C | -5.497926 | -0.724546 | -0.689680 |
| C | -6.111266 | -1.945255 | -1.007604 |
| C | -7.484243 | -2.097129 | -0.781949 |
| C | -8.237457 | -1.038933 | -0.255945 |
| C | -7.612619 | 0.176910  | 0.053111  |
| C | -6.238472 | 0.340136  | -0.155605 |
| O | -3.189775 | -2.579834 | -0.090595 |
| H | 6.806244  | -2.363957 | 1.352867  |
| H | 5.084330  | -2.891070 | 1.411212  |
| H | -0.946300 | 3.378643  | -0.399568 |
| H | 5.683850  | -1.653770 | 2.570356  |
| H | 0.804150  | 3.658642  | -0.735080 |
| H | -0.138904 | 2.467140  | -1.713786 |
| H | -5.744823 | 1.281885  | 0.088544  |
| H | -8.194236 | 1.004898  | 0.465348  |
| H | -9.309839 | -1.161847 | -0.086043 |
| H | -7.965411 | -3.047848 | -1.023639 |
| H | -5.520429 | -2.766024 | -1.416697 |

PCM=toluene

G(B3LYP-D3/6-311+G\*\*)= -3316.254187

E(B3LYP-D3/6-311+G\*\*)= -3316.447760

|   |           |           |           |
|---|-----------|-----------|-----------|
| C | 0.009820  | -0.024080 | -0.010970 |
| C | 0.021207  | -0.002545 | 1.382052  |
| C | 1.216207  | 0.039521  | 2.098059  |
| C | 2.421467  | 0.053906  | 1.400946  |
| C | 2.427224  | 0.038180  | 0.006595  |
| C | 1.222592  | 0.002179  | -0.694627 |
| N | -1.221365 | -0.019702 | 2.096986  |

|   |            |           |           |
|---|------------|-----------|-----------|
| C | -2.337403  | 0.735196  | 1.791336  |
| N | -3.374155  | 0.373217  | 2.815584  |
| N | -2.921358  | -0.477110 | 3.588767  |
| C | -1.508702  | -0.814320 | 3.197050  |
| O | -2.523128  | 1.530333  | 0.921388  |
| O | -0.829708  | -1.604920 | 3.773670  |
| N | -5.088972  | -1.156162 | 0.885267  |
| C | -5.970589  | -1.228815 | 1.973841  |
| C | -5.681927  | -2.303862 | 2.827242  |
| S | -4.285751  | -3.192832 | 2.205092  |
| C | -4.110445  | -2.112679 | 0.830038  |
| P | -6.427941  | -2.839544 | 4.313909  |
| C | -7.708403  | -1.639009 | 4.484495  |
| C | -7.999159  | -0.563268 | 3.626841  |
| S | -9.382010  | 0.337207  | 4.259849  |
| C | -9.546729  | -0.731575 | 5.649646  |
| N | -8.576326  | -1.699574 | 5.581067  |
| P | -7.243845  | -0.022344 | 2.147778  |
| C | -8.450429  | -2.745368 | 6.598685  |
| S | -10.718213 | -0.526162 | 6.808913  |
| C | -5.210361  | -0.103502 | -0.128092 |
| S | -2.893430  | -2.284418 | -0.293113 |
| H | -9.219606  | -2.582904 | 7.348781  |
| H | -7.465068  | -2.690510 | 7.065679  |
| H | -4.449203  | -0.272310 | -0.884660 |
| H | -8.586847  | -3.726920 | 6.140058  |
| H | -6.200551  | -0.147556 | -0.584882 |
| H | -5.050152  | 0.871703  | 0.333674  |
| H | -0.928552  | -0.065776 | -0.546008 |
| H | 1.222358   | -0.012811 | -1.777998 |
| H | 3.367736   | 0.053324  | -0.531503 |
| H | 3.354727   | 0.081312  | 1.950592  |
| H | 1.203536   | 0.052005  | 3.179931  |

## TS of 2'

G(B3LYP-D3/6-311+G\*\*)= -3226.768561

E(B3LYP-D3/6-311+G\*\*)= -3226.953666

|   |           |           |           |
|---|-----------|-----------|-----------|
| N | 0.014834  | 0.071333  | -0.023075 |
| C | 0.009326  | 0.072557  | 1.368647  |
| C | 1.277158  | 0.086530  | 1.921307  |
| S | 2.488204  | 0.095480  | 0.643958  |
| C | 1.256876  | 0.065332  | -0.625174 |
| P | -1.502127 | -0.200395 | 2.279942  |
| C | -1.008480 | 0.279452  | 3.903691  |
| S | -2.208637 | 0.512456  | 5.170053  |
| C | -0.979822 | 0.486857  | 6.441718  |

|   |           |           |           |
|---|-----------|-----------|-----------|
| N | 0.255295  | 0.327017  | 5.846604  |
| C | 0.255229  | 0.201860  | 4.460508  |
| P | 1.732373  | -0.286887 | 3.583793  |
| C | 1.483991  | 0.227903  | 6.637378  |
| S | -1.325891 | 0.663119  | 8.049332  |
| S | 1.610829  | 0.063825  | -2.240716 |
| C | -1.221032 | 0.011768  | -0.806613 |
| C | 0.564624  | -2.565619 | 3.318467  |
| C | 1.611698  | -3.370386 | 3.939607  |
| O | 1.669276  | -3.145050 | 5.267341  |
| C | 2.657173  | -3.917596 | 5.985617  |
| C | -0.542282 | -2.541384 | 2.755001  |
| C | -1.659808 | -3.301860 | 2.204893  |
| O | -1.702317 | -3.193210 | 0.861997  |
| C | -2.758396 | -3.935821 | 0.212449  |
| O | 2.328063  | -4.131303 | 3.339741  |
| O | -2.439087 | -3.938120 | 2.868149  |
| H | 2.248451  | 0.874737  | 6.204438  |
| H | 1.258593  | 0.546045  | 7.652457  |
| H | 1.834296  | -0.806349 | 6.645551  |
| H | -0.972051 | 0.214674  | -1.845479 |
| H | -1.663095 | -0.983169 | -0.722130 |
| H | -1.922357 | 0.761513  | -0.437471 |
| H | 2.545175  | -3.628355 | 7.028040  |
| H | 2.467700  | -4.984166 | 5.860689  |
| H | 3.658215  | -3.682170 | 5.620843  |
| H | -2.625191 | -3.753116 | -0.851376 |
| H | -2.664749 | -4.999419 | 0.433961  |
| H | -3.732813 | -3.579657 | 0.550424  |

### TS of 3'

G(B3LYP-D3/6-311+G\*\*)= -3284.148908

E(B3LYP-D3/6-311+G\*\*)= -3284.372567

|   |           |           |           |
|---|-----------|-----------|-----------|
| N | 0.020817  | -0.073252 | -0.041888 |
| C | 0.013519  | -0.042169 | 1.353951  |
| C | 1.278747  | -0.041672 | 1.903119  |
| S | 2.493929  | -0.105458 | 0.630068  |
| C | 1.260924  | -0.137311 | -0.640342 |
| P | -1.495083 | -0.283360 | 2.291548  |
| C | -0.981724 | 0.330586  | 3.870903  |
| C | 0.280185  | 0.275874  | 4.431946  |
| N | 0.290593  | 0.543447  | 5.798836  |
| C | -0.935280 | 0.822713  | 6.369887  |
| S | -2.164628 | 0.772973  | 5.095361  |
| P | 1.739560  | -0.334296 | 3.591425  |
| S | -1.278673 | 1.176449  | 7.945628  |

|   |           |           |           |
|---|-----------|-----------|-----------|
| C | 1.521031  | 0.492734  | 6.598101  |
| S | 1.588307  | -0.201701 | -2.259150 |
| C | -1.187757 | -0.035726 | -0.870612 |
| C | 0.663639  | -2.574726 | 3.467336  |
| C | -0.613544 | -2.598672 | 2.902704  |
| C | -1.597702 | -2.860513 | 3.998781  |
| N | -0.859438 | -2.869312 | 5.208025  |
| C | 0.518265  | -2.767202 | 4.945746  |
| C | -1.433047 | -3.006565 | 6.512227  |
| C | -0.782871 | -3.773467 | 7.482708  |
| C | -1.334793 | -3.877564 | 8.756385  |
| C | -2.532180 | -3.234516 | 9.063470  |
| C | -3.183159 | -2.487688 | 8.084132  |
| C | -2.639628 | -2.370195 | 6.809388  |
| O | -2.784496 | -3.048394 | 3.899788  |
| O | 1.402887  | -2.811805 | 5.770487  |
| H | 1.306484  | 0.929525  | 7.570373  |
| H | 1.839662  | -0.543602 | 6.721850  |
| H | 2.300762  | 1.066907  | 6.095370  |
| H | -2.034568 | 0.259809  | -0.254621 |
| H | -1.041791 | 0.682996  | -1.676484 |
| H | -1.373080 | -1.016920 | -1.311549 |
| H | 0.149329  | -4.266902 | 7.250389  |
| H | -0.823265 | -4.466045 | 9.509255  |
| H | -2.955327 | -3.316111 | 10.057903 |
| H | -4.114731 | -1.983268 | 8.311247  |
| H | -3.151173 | -1.796641 | 6.052056  |
| H | -0.840407 | -2.941587 | 1.903973  |
| H | 1.558278  | -2.926683 | 2.974173  |

#### TS of 4'

G(B3LYP-D3/6-311+G\*\*)= -3316.236937

E(B3LYP-D3/6-311+G\*\*)= -3316.436878

|   |           |           |           |
|---|-----------|-----------|-----------|
| N | -0.025590 | -0.002798 | -0.013749 |
| C | -0.001454 | -0.006692 | 1.372907  |
| C | 1.280937  | 0.029455  | 1.894296  |
| S | 2.462496  | 0.101764  | 0.589953  |
| C | 1.204387  | 0.069655  | -0.647213 |
| P | -1.537039 | 0.122020  | 2.295799  |
| C | -0.968300 | -0.246742 | 3.914074  |
| C | 0.322291  | -0.208222 | 4.435032  |
| N | 0.374376  | -0.427386 | 5.807455  |
| C | -0.839930 | -0.610491 | 6.435930  |
| S | -2.120358 | -0.538813 | 5.220758  |
| P | 1.769095  | 0.376685  | 3.548443  |

|   |           |           |           |
|---|-----------|-----------|-----------|
| S | -1.133934 | -0.870398 | 8.042891  |
| C | 1.642417  | -0.465846 | 6.548344  |
| S | 1.514448  | 0.095787  | -2.269544 |
| C | -1.277007 | -0.006726 | -0.777850 |
| N | 0.720947  | 2.372336  | 3.530618  |
| C | 0.236556  | 2.679246  | 4.878914  |
| N | -1.040682 | 3.171942  | 4.706365  |
| C | -1.363474 | 3.126355  | 3.337630  |
| N | -0.205560 | 2.566707  | 2.656529  |
| C | -1.914209 | 3.606289  | 5.753630  |
| C | -1.980066 | 2.874324  | 6.938529  |
| C | -2.837777 | 3.294476  | 7.950381  |
| C | -3.626464 | 4.430867  | 7.778084  |
| C | -3.551976 | 5.153365  | 6.588035  |
| C | -2.692403 | 4.749005  | 5.570053  |
| O | 0.880258  | 2.547174  | 5.885473  |
| O | -2.347333 | 3.548937  | 2.801379  |
| H | -1.037325 | -0.228439 | -1.815057 |
| H | -1.755507 | 0.973328  | -0.718060 |
| H | 1.433095  | -0.838923 | 7.547753  |
| H | -1.945661 | -0.770545 | -0.379495 |
| H | 2.335217  | -1.137328 | 6.039158  |
| H | 2.061197  | 0.538037  | 6.612758  |
| H | -1.368267 | 1.994990  | 7.077261  |
| H | -2.889431 | 2.723484  | 8.869764  |
| H | -4.296712 | 4.751815  | 8.566989  |
| H | -4.162558 | 6.037649  | 6.448032  |
| H | -2.637639 | 5.298981  | 4.640721  |

2'

G(B3LYP-D3/6-311+G\*\*)= -3226.817348

E(B3LYP-D3/6-311+G\*\*)= -3227.006329

|   |           |           |           |
|---|-----------|-----------|-----------|
| S | 0.020447  | 0.024144  | -0.024515 |
| C | 0.009786  | 0.018114  | 1.726712  |
| C | 1.272922  | 0.015395  | 2.212432  |
| N | 2.257902  | 0.022656  | 1.233353  |
| C | 1.793843  | 0.029561  | -0.067483 |
| P | -1.471552 | -0.069008 | 2.805183  |
| C | -0.824236 | -1.492604 | 3.871000  |
| C | -1.860534 | -2.533048 | 4.169893  |
| O | -1.567558 | -3.712951 | 3.619920  |
| C | -2.468741 | -4.796934 | 3.943778  |
| P | 1.582436  | -0.032701 | 4.046034  |
| C | 0.421181  | -1.498647 | 4.355793  |
| C | 0.925955  | -2.630470 | 5.193041  |
| O | 2.259697  | -2.759553 | 5.072002  |

|   |           |           |           |
|---|-----------|-----------|-----------|
| C | 2.861057  | -3.830133 | 5.831622  |
| C | 3.698744  | 0.028172  | 1.495345  |
| S | 2.707623  | 0.045134  | -1.448529 |
| C | 0.345482  | 1.258382  | 4.465674  |
| C | -0.921172 | 1.251991  | 3.989125  |
| N | -1.724254 | 2.269306  | 4.487091  |
| C | -1.104169 | 3.122797  | 5.377921  |
| S | 0.574381  | 2.584113  | 5.585897  |
| S | -1.777832 | 4.431643  | 6.135159  |
| C | -3.133582 | 2.470000  | 4.141576  |
| O | 0.237593  | -3.339972 | 5.885757  |
| O | -2.861160 | -2.272453 | 4.790902  |
| H | 4.145902  | 0.919657  | 1.053473  |
| H | 4.155633  | -0.849264 | 1.035973  |
| H | 3.863072  | 0.017796  | 2.570399  |
| H | -3.740179 | 2.412522  | 5.046013  |
| H | -3.263423 | 3.458706  | 3.699539  |
| H | -3.440202 | 1.698863  | 3.438761  |
| H | 3.926465  | -3.768749 | 5.623586  |
| H | 2.663701  | -3.692260 | 6.895483  |
| H | 2.457496  | -4.791570 | 5.511004  |
| H | -2.106275 | -5.650960 | 3.377133  |
| H | -2.426509 | -4.995054 | 5.015524  |
| H | -3.489128 | -4.541902 | 3.655495  |

**3'**

G(B3LYP-D3/6-311+G\*\*)= -3284.177987

E(B3LYP-D3/6-311+G\*\*)= -3284.404670

|   |           |           |           |
|---|-----------|-----------|-----------|
| C | 0.068596  | 0.084621  | 0.022331  |
| C | 0.046909  | 0.006198  | 1.413003  |
| C | 1.225319  | -0.095350 | 2.146900  |
| C | 2.444106  | -0.120003 | 1.473160  |
| C | 2.478044  | -0.048634 | 0.081087  |
| C | 1.290346  | 0.053715  | -0.642451 |
| N | -1.215356 | 0.060955  | 2.092640  |
| C | -1.547821 | 1.061030  | 3.017894  |
| C | -3.035172 | 0.935809  | 3.324721  |
| C | -3.471596 | -0.375580 | 2.659204  |
| C | -2.261337 | -0.831431 | 1.849335  |
| P | -3.855148 | 2.562801  | 2.688759  |
| C | -3.716224 | 2.135362  | 0.914846  |
| C | -4.141287 | 0.957594  | 0.385263  |
| N | -3.719520 | 0.741508  | -0.921391 |
| C | -2.930066 | 1.737664  | -1.459419 |
| S | -2.745955 | 3.018323  | -0.249793 |
| P | -4.955937 | -0.331406 | 1.437884  |

|   |           |           |           |
|---|-----------|-----------|-----------|
| C | -6.003481 | 0.785506  | 2.425824  |
| C | -5.582042 | 1.966168  | 2.944334  |
| N | -6.542740 | 2.624404  | 3.705742  |
| C | -7.755741 | 1.973685  | 3.817049  |
| S | -7.661383 | 0.460165  | 2.897196  |
| S | -9.089258 | 2.493158  | 4.648830  |
| C | -6.352023 | 3.924784  | 4.353607  |
| S | -2.246575 | 1.757578  | -2.968466 |
| C | -4.024478 | -0.458066 | -1.707621 |
| O | -0.789843 | 1.889322  | 3.452043  |
| O | -2.217931 | -1.772151 | 1.095097  |
| H | -4.476887 | -0.162273 | -2.654201 |
| H | -3.103308 | -1.004519 | -1.912595 |
| H | -4.704755 | -1.088411 | -1.140720 |
| H | -7.101505 | 4.626375  | 3.985321  |
| H | -6.481588 | 3.819439  | 5.431552  |
| H | -5.352835 | 4.290977  | 4.128922  |
| H | 1.185566  | -0.138641 | 3.227570  |
| H | 3.366120  | -0.193135 | 2.037789  |
| H | 3.428872  | -0.067465 | -0.438856 |
| H | 1.308534  | 0.120551  | -1.723681 |
| H | -0.853426 | 0.175134  | -0.535786 |
| H | -3.188234 | 0.944798  | 4.404196  |
| H | -3.723268 | -1.143149 | 3.393616  |

4'

G(B3LYP-D3/6-311+G\*\*)= -3316.270784

E(B3LYP-D3/6-311+G\*\*)= -3316.472876

|   |           |           |           |
|---|-----------|-----------|-----------|
| C | -0.040689 | 0.102741  | -0.018000 |
| C | -0.004624 | 0.009830  | 1.372851  |
| C | 1.209967  | -0.023503 | 2.057079  |
| C | 2.399201  | 0.042501  | 1.336936  |
| C | 2.376435  | 0.127731  | -0.054339 |
| C | 1.156268  | 0.153984  | -0.727319 |
| N | -1.228212 | -0.048115 | 2.113415  |
| C | -1.477089 | 0.698594  | 3.273330  |
| N | -2.744684 | 0.297150  | 3.715332  |
| N | -3.270497 | -0.642136 | 2.774189  |
| C | -2.341175 | -0.816843 | 1.746046  |
| P | -3.816366 | 1.385697  | 4.611690  |
| C | -4.874343 | 1.861691  | 3.195639  |
| C | -5.370295 | 0.944683  | 2.319978  |
| N | -5.927723 | 1.497616  | 1.177154  |
| C | -5.896084 | 2.879090  | 1.111500  |
| S | -5.091042 | 3.486699  | 2.571784  |
| P | -5.007684 | -0.865436 | 2.554473  |



|   |           |           |           |
|---|-----------|-----------|-----------|
| C | -5.382024 | -0.916472 | 4.339430  |
| C | -4.890994 | -0.000781 | 5.210904  |
| N | -5.200602 | -0.256645 | 6.537402  |
| C | -5.960986 | -1.391683 | 6.755423  |
| S | -6.264105 | -2.168644 | 5.188217  |
| S | -6.513765 | -1.950149 | 8.209894  |
| C | -4.800606 | 0.582168  | 7.670508  |
| S | -6.512456 | 3.827839  | -0.093730 |
| C | -6.555508 | 0.729306  | 0.098470  |
| O | -0.759244 | 1.507793  | 3.804003  |
| O | -2.483914 | -1.499132 | 0.761820  |
| H | -7.607313 | 1.007320  | 0.017817  |
| H | -6.063376 | 0.961435  | -0.846236 |
| H | -6.462008 | -0.332551 | 0.314756  |
| H | -4.230218 | -0.016550 | 8.381207  |
| H | -4.193313 | 1.408166  | 7.307053  |
| H | -5.690050 | 0.961817  | 8.175083  |
| H | 1.220430  | -0.081215 | 3.137095  |
| H | 3.344384  | 0.023884  | 1.866648  |
| H | 3.305141  | 0.174005  | -0.611085 |
| H | 1.131438  | 0.219431  | -1.808728 |
| H | -0.989952 | 0.116117  | -0.535256 |

G(M06-2X/6-311+G\*\*) = -3315.652502

E(M06-2X/6-311+G\*\*) = -3315.858950

|   |           |           |           |
|---|-----------|-----------|-----------|
| C | -0.009009 | 0.035704  | -0.013217 |
| C | 0.007779  | 0.003296  | 1.377319  |
| C | 1.206804  | 0.010422  | 2.082990  |
| C | 2.404347  | 0.056517  | 1.381025  |
| C | 2.403453  | 0.081239  | -0.009710 |
| C | 1.197536  | 0.067256  | -0.701927 |
| N | -1.224153 | -0.036142 | 2.100001  |
| C | -1.479966 | 0.717524  | 3.247580  |
| N | -2.751040 | 0.326518  | 3.675481  |
| N | -3.269983 | -0.604232 | 2.744293  |
| C | -2.335042 | -0.796747 | 1.729261  |
| P | -3.801435 | 1.397679  | 4.582551  |
| C | -4.877526 | 1.870224  | 3.185987  |
| C | -5.371508 | 0.956050  | 2.316157  |
| N | -5.973048 | 1.512434  | 1.202006  |
| C | -5.976301 | 2.886085  | 1.164435  |
| S | -5.153862 | 3.486829  | 2.597387  |
| P | -4.987649 | -0.845818 | 2.525895  |
| C | -5.351834 | -0.907231 | 4.308171  |
| C | -4.864565 | 0.006691  | 5.175339  |
| N | -5.171086 | -0.256438 | 6.497576  |
| C | -5.921059 | -1.389052 | 6.705699  |

|   |           |           |           |
|---|-----------|-----------|-----------|
| S | -6.220344 | -2.156467 | 5.152342  |
| S | -6.466347 | -1.951143 | 8.154210  |
| C | -4.780666 | 0.569957  | 7.636511  |
| S | -6.646686 | 3.831881  | -0.004882 |
| C | -6.607721 | 0.758173  | 0.124392  |
| O | -0.770514 | 1.524121  | 3.778519  |
| O | -2.475417 | -1.483759 | 0.756300  |
| H | -7.663581 | 1.025051  | 0.072193  |
| H | -6.137602 | 1.021562  | -0.822826 |
| H | -6.492857 | -0.305438 | 0.318090  |
| H | -4.214116 | -0.037917 | 8.341733  |
| H | -4.174931 | 1.400799  | 7.283395  |
| H | -5.675813 | 0.937389  | 8.138902  |
| H | 1.197727  | -0.003693 | 3.164799  |
| H | 3.340255  | 0.069346  | 1.925793  |
| H | 3.340302  | 0.112003  | -0.552369 |
| H | 1.190758  | 0.086150  | -1.784742 |
| H | -0.950976 | 0.020607  | -0.544224 |

G(BP86/6-311+G\*\*) = -3316.422911

E(BP86/6-311+G\*\*) = -3316.614887

|   |           |           |           |
|---|-----------|-----------|-----------|
| S | -0.023920 | 0.045265  | 0.009809  |
| C | -0.023740 | -0.008781 | 1.765208  |
| C | 1.256963  | -0.010157 | 2.248477  |
| N | 2.236177  | 0.020805  | 1.262994  |
| C | 1.762759  | 0.038952  | -0.049790 |
| P | -1.481446 | 0.096546  | 2.864484  |
| C | -0.923080 | -1.218688 | 4.062169  |
| C | 0.362963  | -1.218245 | 4.546787  |
| S | 0.519245  | -2.359180 | 5.877065  |
| C | -1.190885 | -2.856966 | 5.735106  |
| N | -1.772493 | -2.107678 | 4.711454  |
| P | 1.581942  | 0.067138  | 4.077178  |
| N | 0.508680  | 1.476385  | 4.291560  |
| C | 0.568854  | 2.306856  | 5.430412  |
| N | -0.733283 | 2.837503  | 5.575663  |
| C | -1.633710 | 2.269633  | 4.644931  |
| N | -0.841658 | 1.455985  | 3.814712  |
| C | -1.099248 | 3.804103  | 6.571351  |
| C | -2.296286 | 3.648959  | 7.286984  |
| C | -2.644946 | 4.601787  | 8.251202  |
| C | -1.801956 | 5.690188  | 8.511546  |
| C | -0.605325 | 5.830314  | 7.795651  |
| C | -0.250582 | 4.894152  | 6.817952  |
| O | 1.553362  | 2.522765  | 6.111411  |
| O | -2.833687 | 2.448495  | 4.545572  |
| C | -3.180567 | -2.327704 | 4.359036  |

|   |           |           |           |
|---|-----------|-----------|-----------|
| S | -1.929297 | -4.025289 | 6.649037  |
| C | 3.682432  | 0.011702  | 1.513821  |
| S | 2.676934  | 0.043062  | -1.431747 |
| H | -3.316272 | -3.361864 | 4.009086  |
| H | -3.807598 | -2.178394 | 5.249296  |
| H | -3.465124 | -1.617728 | 3.572128  |
| H | 4.141951  | 0.887337  | 1.033481  |
| H | 3.855103  | 0.038756  | 2.597243  |
| H | 4.127404  | -0.895133 | 1.078438  |
| H | 0.681761  | 4.997100  | 6.261521  |
| H | 0.057978  | 6.675817  | 7.993541  |
| H | -2.076346 | 6.427105  | 9.270349  |
| H | -3.579903 | 4.485758  | 8.804759  |
| H | -2.951240 | 2.802488  | 7.079387  |

G( $\omega$ B97XD/6-311+G\*\*) = -3315.753168

E( $\omega$ B97XD/6-311+G\*\*) = -3315.961136

|   |           |           |           |
|---|-----------|-----------|-----------|
| C | -0.005017 | 0.206450  | 0.016733  |
| C | 0.011862  | 0.001307  | 1.390509  |
| C | 1.209033  | -0.158631 | 2.076848  |
| C | 2.405225  | -0.103731 | 1.375221  |
| C | 2.401574  | 0.093491  | -0.000667 |
| C | 1.196840  | 0.243903  | -0.676970 |
| N | -1.217898 | -0.041196 | 2.113775  |
| C | -1.477977 | 0.724377  | 3.250194  |
| N | -2.752041 | 0.343304  | 3.669799  |
| N | -3.264799 | -0.600457 | 2.745372  |
| C | -2.323825 | -0.805027 | 1.741758  |
| P | -3.812125 | 1.408024  | 4.561555  |
| C | -4.888490 | 1.864801  | 3.164216  |
| C | -5.374692 | 0.939974  | 2.303403  |
| N | -5.986481 | 1.479201  | 1.187231  |
| C | -6.007131 | 2.852813  | 1.142661  |
| S | -5.185576 | 3.473276  | 2.566092  |
| P | -4.976590 | -0.851365 | 2.536475  |
| C | -5.344907 | -0.902208 | 4.315132  |
| C | -4.864020 | 0.022161  | 5.172817  |
| N | -5.161901 | -0.230677 | 6.498221  |
| C | -5.901303 | -1.368621 | 6.717091  |
| S | -6.197817 | -2.152614 | 5.172952  |
| S | -6.442094 | -1.926586 | 8.170364  |
| C | -4.777588 | 0.617876  | 7.619207  |
| S | -6.695626 | 3.788577  | -0.026374 |
| C | -6.613904 | 0.703603  | 0.124376  |
| O | -0.767251 | 1.533855  | 3.777889  |
| O | -2.454416 | -1.502198 | 0.773134  |

|   |           |           |           |
|---|-----------|-----------|-----------|
| H | -7.681279 | 0.927278  | 0.089014  |
| H | -6.171490 | 0.976164  | -0.834145 |
| H | -6.458504 | -0.356489 | 0.314949  |
| H | -4.218044 | 0.028332  | 8.346045  |
| H | -4.162148 | 1.437446  | 7.253453  |
| H | -5.671836 | 1.009423  | 8.106460  |
| H | 1.202208  | -0.310761 | 3.148754  |
| H | 3.342513  | -0.219088 | 1.906583  |
| H | 3.337675  | 0.131859  | -0.545605 |
| H | 1.189785  | 0.398285  | -1.749515 |
| H | -0.947623 | 0.321298  | -0.502574 |

PCM=toluene

G(B3LYP-D3/6-311+G\*\*)= -3316.282309

E(B3LYP-D3/6-311+G\*\*)= -3316.484042

|   |           |           |           |
|---|-----------|-----------|-----------|
| S | -0.007818 | 0.062876  | 0.038040  |
| C | -0.013428 | 0.017368  | 1.786655  |
| C | 1.254212  | 0.003167  | 2.269098  |
| N | 2.233954  | 0.017878  | 1.288289  |
| C | 1.761466  | 0.037321  | -0.007061 |
| P | -1.476192 | 0.125154  | 2.875251  |
| C | -0.934687 | -1.198947 | 4.065787  |
| C | 0.335805  | -1.205035 | 4.552880  |
| S | 0.487725  | -2.367872 | 5.854229  |
| C | -1.206316 | -2.853223 | 5.690762  |
| N | -1.783265 | -2.101833 | 4.688929  |
| P | 1.567175  | 0.071505  | 4.096510  |
| N | 0.502430  | 1.466186  | 4.324577  |
| C | 0.561483  | 2.303689  | 5.439897  |
| N | -0.723951 | 2.842292  | 5.572252  |
| C | -1.613975 | 2.291702  | 4.641667  |
| N | -0.839479 | 1.460408  | 3.836463  |
| C | -1.089598 | 3.804385  | 6.566366  |
| C | -2.220936 | 3.587990  | 7.351388  |
| C | -2.571503 | 4.532046  | 8.313275  |
| C | -1.789763 | 5.671825  | 8.497931  |
| C | -0.655649 | 5.872777  | 7.711571  |
| C | -0.304068 | 4.943166  | 6.736455  |
| O | 1.530315  | 2.520638  | 6.127442  |
| O | -2.800460 | 2.495795  | 4.538390  |
| C | -3.188375 | -2.314308 | 4.324136  |
| S | -1.940973 | -4.035841 | 6.595559  |
| C | 3.678038  | -0.008286 | 1.545491  |
| S | 2.669386  | 0.029828  | -1.397316 |
| H | -3.325948 | -3.345910 | 3.998928  |
| H | -3.820510 | -2.133543 | 5.193330  |
| H | -3.456924 | -1.631252 | 3.522000  |

|   |           |           |          |
|---|-----------|-----------|----------|
| H | 4.143605  | 0.862022  | 1.083285 |
| H | 3.849804  | 0.005719  | 2.618949 |
| H | 4.108826  | -0.909877 | 1.109137 |
| H | 0.574626  | 5.089563  | 6.122170 |
| H | -0.044231 | 6.756262  | 7.852111 |
| H | -2.063075 | 6.400624  | 9.252052 |
| H | -3.453690 | 4.371483  | 8.921683 |
| H | -2.822119 | 2.701413  | 7.200703 |

## 4 References

<sup>1</sup> M. J. Frisch, G. W. Trucks, H. B. Schlegel, G. E. Scuseria, M. A. Robb, J. R. Cheeseman, G. Scalmani, V. Barone, B. Mennucci, G. A. Petersson, H. Nakatsuji, M. Caricato, X. Li, H. P. Hratchian, A. F. Izmaylov, J. Bloino, G. Zheng, J. L. Sonnenberg, M. Hada, M. Ehara, K. Toyota, R. Fukuda, J. Hasegawa, M. Ishida, T. Nakajima, Y. Honda, O. Kitao, H. Nakai, T. Vreven, J. A. Montgomery Jr., J. E. Peralta, F. Ogliaro, M. Bearpark, J. J. Heyd, E. Brothers, K. N. Kudin, V. N. Staroverov, T. Keith, R. Kobayashi, J. Normand, K. Raghavachari, A. Rendell, J. C. Burant, S. S. Iyengar, J. Tomasi, M. Cossi, N. Rega, J. M. Millam, M. Klene, J. E. Knox, J. B. Cross, V. Bakken, C. Adamo, J. Jaramillo, R. Gomperts, R. E. Stratmann, O. Yazyev, A. J. Austin, R. Cammi, C. Pomelli, J. W. Ochterski, R. L. Martin, K. Morokuma, V. G. Zakrzewski, G. A. Voth, P. Salvador, J. J. Dannenberg, S. Dapprich, A. D. Daniels, O. Farkas, J. B. Foresman, J. V. Ortiz, J. Cioslowski and D. J. Fox, *Gaussian 09, Revision B.01*, Gaussian Inc., Wallingford, CT, **2010**, p.

<sup>2</sup> G. Schaftenaar and J. H. Noordik, *J. Comput.-Aided Mol. Des.* **2000**, *14*, 123-134.
